# Supplementary material for: An efficient synthesis of sulfonated quinoline diones by copper catalyzed sulfonylation of activated alkenes with sulfonylhydrazides
Source: Royal Society of Chemistry journal article supplement (doi:10.1039/c5ra27878c), 2016-01-01

## Supporting Information

### **An efficient synthesis of sulfonated quinoline diones by copper catalyzed sulfonylation of activated alkenes with sulfonylhydrazides**

Shucheng Wang, Xuhu Huang, Qi Wang, Zemei Ge, Xin Wang\* and Runtao Li\*

State Key Laboratory of Nature and Biomimetic Drugs, School of Pharmaceutical  
Sciences, Peking University, Xueyuan Rd. 38, Beijing 100191, China

E-mail: xinwang@bjmu.edu.cn; lirt@bjmu.edu.cn

#### **List of contents**

|                                                                            |   |
|----------------------------------------------------------------------------|---|
| A General information .....                                                | 2 |
| B Experiment procedure and characterization data for products .....        | 2 |
| a General procedure for the synthesis of sulfonated quinoline diones ..... | 2 |
| b Characterization data .....                                              | 2 |

#### **A General information**

All melting points (mp) were measured on a melting point apparatus with a microscope and a hot stage and were uncorrected. <sup>1</sup>H-NMR spectra were determined

in CDCl<sub>3</sub> on a Bruker 400 spectrometer and chemical shifts were reported in parts per million from internal TMS ( $\delta$ ). Data for <sup>1</sup>H-NMR are recorded as follows: chemical shift ( $\delta$ , ppm), multiplicity (integration, s=singlet, d=doublet, dd=doublets, t=triplet, q=quartet, m=multiplet or unresolved, coupling constants (s) in Hertz). <sup>13</sup>C-NMR spectra were obtained by using the same NMR spectrometers. High-resolution mass spectra (HRMS) was performed with 200-300 mesh silica gel using flash column techniques. All of the reagents obtained commercially were used directly unless otherwise noted.

## B Experiment procedure and characterization data for products

### a General procedure for the synthesis of sulfonated quinoline diones

To a suspension of N-(2-cyanophenyl) acrylamides **1** (0.3 mmol), (NH<sub>4</sub>)<sub>2</sub>S<sub>2</sub>O<sub>8</sub> (0.90 mmol), CuI (0.06 mmol) in CH<sub>3</sub>CN/H<sub>2</sub>O (2/1, 5.0 mL) was added sulfonohydrazides **2** (0.45 mmol) at room temperature, the solution was stirred at 80°C for 12h. Water (10 mL) was added to the solution and the mixture was extracted with DCM (2x10 mL). The combined organic phase was dried over Na<sub>2</sub>SO<sub>4</sub>. After removal of solvents with a rotary evaporator, the residue was purified on a silica gel column with petroleum ether and ethyl acetate as eluent to afford the desired product **3**.

### b Characterization data

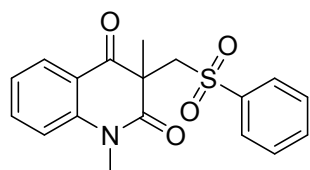

**1,3-dimethyl-3-((phenylsulfonyl)methyl)quinoline-2,4(1H,3H)-dione (3a)**: 95% yield, white solid, mp = 118-120 °C; <sup>1</sup>H NMR (400 MHz, CDCl<sub>3</sub>)  $\delta$  8.10 (d,  $J$  = 7.6 Hz, 1H), 7.85 (d,  $J$  = 7.6 Hz, 2H), 7.71-7.61 (m, 2H), 7.56-7.52 (m, 2H), 7.27-7.21 (m, 2H), 4.25 (s, 2H), 3.55 (s, 3H), 1.43 (s, 3H); <sup>13</sup>C NMR (101 MHz, CDCl<sub>3</sub>)  $\delta$  194.2, 171.7, 143.1, 141.6, 136.5, 133.6, 129.0, 128.7, 127.8, 123.3, 119.2, 115.2, 62.2, 55.3, 30.1, 25.9. HRMS (ESI):  $m/z$  calcd for C<sub>18</sub>H<sub>18</sub>NO<sub>4</sub>S [M+H]<sup>+</sup>: 344.0951; found: 344.0957.

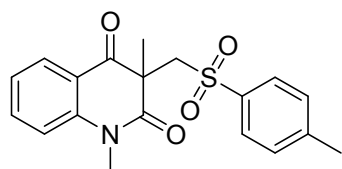

**1,3-dimethyl-3-(tosylmethyl)quinoline-2,4(1H,3H)-dione (3b)**: 92% yield, white solid, mp = 167-169 °C; <sup>1</sup>H NMR (400 MHz, CDCl<sub>3</sub>)  $\delta$  8.12-8.10 (m, 1H), 7.72 (d,  $J$

= 8.0 Hz, 2H), 7.69-7.67 (m, 1H), 7.33 (d,  $J = 8.0$  Hz, 2H), 7.26-7.21 (m, 2H), 4.23 (s, 2H), 3.55 (s, 3H), 2.44 (s, 3H), 1.43 (s, 3H);  $^{13}\text{C}$  NMR (101 MHz,  $\text{CDCl}_3$ )  $\delta$  194.2, 171.7, 144.5, 143.2, 138.7, 136.5, 129.6, 128.7, 127.8, 123.3, 119.3, 115.1, 62.4, 55.2, 30.1, 25.9, 21.6. HRMS (ESI):  $m/z$  calcd for  $\text{C}_{19}\text{H}_{20}\text{NO}_4\text{S}$   $[\text{M}+\text{H}]^+$ : 358.1108; found: 358.1114.

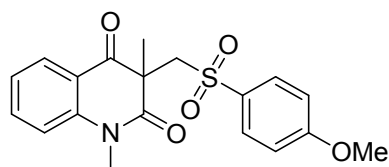

**3-(((4-methoxyphenyl)sulfonyl)methyl)-1,3-dimethylquinoline-2,4(1H,3H)-dione (3c):** 98% yield, white solid, mp = 145-147 °C;  $^1\text{H}$  NMR (400 MHz,  $\text{CDCl}_3$ )  $\delta$  8.10 (d,  $J = 8.8$  Hz, 1H), 7.76 (d,  $J = 8.8$  Hz, 2H), 7.70-7.66 (m, 1H), 7.25-7.20 (m, 2H), 6.98 (d,  $J = 8.8$  Hz, 2H), 4.22 (s, 2H), 3.87 (s, 3H), 3.55 (s, 3H), 1.42 (s, 3H);  $^{13}\text{C}$  NMR (101 MHz,  $\text{CDCl}_3$ )  $\delta$  194.3, 171.7, 163.6, 143.2, 136.5, 133.2, 130.0, 128.6, 123.3, 119.3, 115.1, 114.2, 62.7, 55.7, 55.2, 30.1, 25.9. HRMS (ESI):  $m/z$  calcd for  $\text{C}_{19}\text{H}_{20}\text{NO}_5\text{S}$   $[\text{M}+\text{H}]^+$ : 374.1057; found: 374.1064.

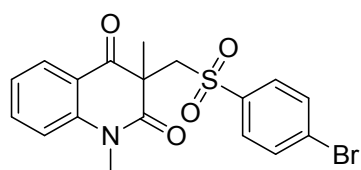

**3-(((4-bromophenyl)sulfonyl)methyl)-1,3-dimethylquinoline-2,4(1H,3H)-dione (3d):** 84% yield, white solid, mp = 173-175 °C;  $^1\text{H}$  NMR (400 MHz,  $\text{CDCl}_3$ )  $\delta$  8.09 (d,  $J = 6.8$  Hz, 1H), 7.73-7.67 (m, 5H), 7.27-7.23 (m, 2H), 4.25 (s, 2H), 3.56 (s, 3H), 1.43 (s, 3H);  $^{13}\text{C}$  NMR (101 MHz,  $\text{CDCl}_3$ )  $\delta$  194.2, 171.6, 143.1, 140.6, 136.6, 132.3, 129.5, 128.9, 128.7, 123.4, 119.2, 115.2, 62.1, 55.6, 30.2, 25.8. HRMS (ESI):  $m/z$  calcd for  $\text{C}_{18}\text{H}_{17}\text{BrNO}_3$   $[\text{M}+\text{H}]^+$ : 422.0056; found: 422.0068.

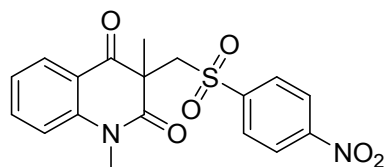

**1,3-dimethyl-3-(((4-nitrophenyl)sulfonyl)methyl)quinoline-2,4(1H,3H)-dione (3e):** 83% yield, white solid, mp = 190-192 °C;  $^1\text{H}$  NMR (400 MHz,  $\text{CDCl}_3$ )  $\delta$  8.41-8.38 (m, 2H), 8.10-8.06 (m, 3H), 7.75-7.70 (m, 1H), 7.29-7.25 (m, 2H), 4.31 (s, 2H), 3.58 (s, 3H), 1.45 (s, 3H);  $^{13}\text{C}$  NMR (101 MHz,  $\text{CDCl}_3$ )  $\delta$  194.2, 171.6, 150.7, 147.2, 143.0, 136.8, 129.4, 128.7, 124.2, 123.6, 119.1, 115.3, 61.7, 56.0, 30.2, 25.7. HRMS (ESI):  $m/z$  calcd for  $\text{C}_{18}\text{H}_{17}\text{N}_2\text{O}_6\text{S}$   $[\text{M}+\text{H}]^+$ : 389.0802; found: 389.0811.

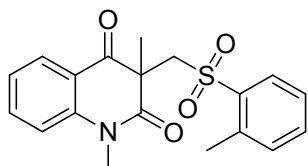

**1,3-dimethyl-3-((o-tolylsulfonyl)methyl)quinoline-2,4(1H,3H)-dione (3f):** 81% yield, white solid, mp = 142-144 °C; <sup>1</sup>H NMR (400 MHz, CDCl<sub>3</sub>) δ 8.07 (d, *J* = 7.6 Hz, 1H), 7.71-7.65 (m, 3H), 7.51-7.48 (m, 1H), 7.35-7.21 (m, 3H), 4.28 (s, 2H), 3.51 (s, 3H), 2.75 (s, 3H), 1.45 (s, 3H); <sup>13</sup>C NMR (101 MHz, CDCl<sub>3</sub>) δ 194.0, 171.5, 143.1, 139.8, 137.5, 136.5, 133.5, 132.5, 129.2, 128.7, 126.2, 123.3, 119.3, 115.1, 61.7, 54.7, 30.1, 26.0, 20.5. HRMS (ESI): *m/z* calcd for C<sub>19</sub>H<sub>20</sub>NNO<sub>4</sub>S [M+H]<sup>+</sup>: 358.1108; found: 358.1116.

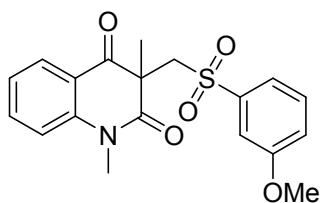

**3-(((3-methoxyphenyl)sulfonyl)methyl)-1,3-dimethylquinoline-2,4(1H,3H)-dione (3g):** 93% yield, white solid, mp = 143-145 °C; <sup>1</sup>H NMR (400 MHz, CDCl<sub>3</sub>) δ 8.10 (d, *J* = 8.8 Hz, 1H), 7.68 (t, *J* = 8.6 Hz, 1H), 7.43-7.41 (m, 2H), 7.34 (s, 1H), 7.25-7.20 (m, 2H), 7.16-7.13 (m, 1H), 4.24 (s, 2H), 3.86 (s, 3H), 3.54 (s, 3H), 1.43 (s, 3H); <sup>13</sup>C NMR (101 MHz, CDCl<sub>3</sub>) δ 194.2, 171.6, 159.8, 143.1, 142.6, 136.5, 130.1, 128.6, 123.3, 120.3, 119.9, 119.2, 115.2, 112.2, 62.3, 55.7, 55.2, 30.1, 25.9. HRMS (ESI): *m/z* calcd for C<sub>19</sub>H<sub>20</sub>NO<sub>5</sub>S [M+H]<sup>+</sup>: 374.1057; found: 374.1066.

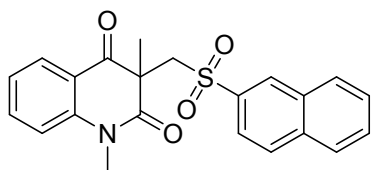

**1,3-dimethyl-3-((naphthalen-2-ylsulfonyl)methyl)quinoline-2,4(1H,3H)-dione (3h):** 91% yield, yellow solid, mp = 135-137 °C; <sup>1</sup>H NMR (400 MHz, CDCl<sub>3</sub>) δ 8.37 (s, 1H), 8.09 (dd, *J* = 7.6 Hz, *J* = 1.6 Hz, 1H), 7.99 (d, *J* = 8.8 Hz, 1H), 7.94-7.91 (m, 2H), 7.87 (dd, *J* = 8.4 Hz, *J* = 1.6 Hz, 1H), 7.70-7.58 (m, 3H), 7.24-7.20 (m, 2H), 4.32 (s, 2H), 3.52 (s, 3H), 1.44 (s, 3H); <sup>13</sup>C NMR (101 MHz, CDCl<sub>3</sub>) δ 194.2, 171.6, 143.2, 138.2, 136.6, 135.3, 132.0, 129.6, 129.5, 129.4, 129.2, 128.7, 128.0, 127.5, 123.3, 122.6, 119.3, 115.2, 62.3, 55.2, 30.1, 26.1. HRMS (ESI): *m/z* calcd for C<sub>22</sub>H<sub>20</sub>BrNO<sub>4</sub>S [M+H]<sup>+</sup>: 394.1108; found: 394.1117.

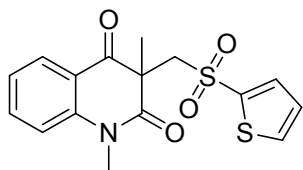

**1,3-dimethyl-3-((thiophen-2-ylsulfonyl)methyl)quinoline-2,4(1H,3H)-dione (3i):** 74% yield, yellow solid, mp = 174-176 °C;  $^1\text{H NMR}$  (400 MHz,  $\text{CDCl}_3$ )  $\delta$  8.10 (dd,  $J = 7.6$  Hz,  $J = 1.2$  Hz, 1H), 7.71-7.62 (m, 3H), 7.23 (t,  $J = 8.4$  Hz, 2H), 7.12 (t,  $J = 4.4$  Hz, 1H), 4.38 (s, 2H), 3.55 (s, 3H), 1.45 (s, 3H);  $^{13}\text{C NMR}$  (101 MHz,  $\text{CDCl}_3$ )  $\delta$  194.2, 171.6, 143.1, 142.8, 136.6, 134.0, 133.9, 128.7, 127.6, 123.4, 119.2, 115.2, 63.4, 55.5, 30.2, 25.9. HRMS (ESI):  $m/z$  calcd for  $\text{C}_{16}\text{H}_{16}\text{NO}_4\text{S}_2$   $[\text{M}+\text{H}]^+$ : 350.0515; found: 350.0524.

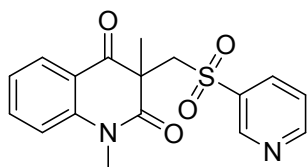

**1,3-dimethyl-3-((pyridin-3-ylsulfonyl)methyl)quinoline-2,4(1H,3H)-dione (3j):** 72% yield, light yellow solid, mp = 146-148 °C;  $^1\text{H NMR}$  (400 MHz,  $\text{CDCl}_3$ )  $\delta$  9.03 (s, 1H), 8.85 (d,  $J = 3.6$  Hz, 1H), 8.11 (q,  $J = 7.9$  Hz, 2H), 7.70 (t,  $J = 7.8$  Hz, 1H), 7.52-7.48 (m, 1H), 7.28-7.22 (m, 2H), 4.29 (s, 2H), 3.55 (s, 3H), 1.43 (s, 3H);  $^{13}\text{C NMR}$  (101 MHz,  $\text{CDCl}_3$ )  $\delta$  194.2, 171.6, 154.0, 149.0, 143.0, 138.2, 136.7, 135.7, 128.7, 123.6, 123.5, 119.1, 115.3, 62.2, 55.8, 30.2, 25.7. HRMS (ESI):  $m/z$  calcd for  $\text{C}_{17}\text{H}_{17}\text{N}_2\text{O}_4\text{S}$   $[\text{M}+\text{H}]^+$ : 345.0904; found: 345.0909.

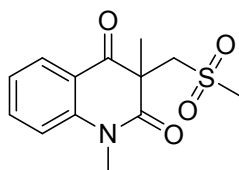

**1,3-dimethyl-3-((methylsulfonyl)methyl)quinoline-2,4(1H,3H)-dione (3k):** 62% yield, white solid, mp = 132-134 °C;  $^1\text{H NMR}$  (400 MHz,  $\text{CDCl}_3$ )  $\delta$  8.09 (dd,  $J = 8.1$  Hz,  $J = 1.6$  Hz, 1H), 7.70-7.66 (m, 1H), 7.26-7.22 (m, 2H), 4.16 (s, 2H), 3.54 (s, 3H), 3.04 (s, 3H), 1.46 (s, 3H);  $^{13}\text{C NMR}$  (101 MHz,  $\text{CDCl}_3$ )  $\delta$  194.7, 172.0, 143.0, 136.5, 128.7, 123.4, 119.1, 115.2, 59.9, 56.0, 45.2, 30.2, 25.5. HRMS (ESI):  $m/z$  calcd for  $\text{C}_{13}\text{H}_{16}\text{NO}_4\text{S}$   $[\text{M}+\text{H}]^+$ : 282.0795; found: 282.0801.

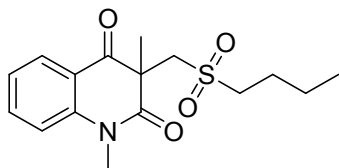

**3-((butylsulfonyl)methyl)-1,3-dimethylquinoline-2,4(1H,3H)-dione (3l):** 63% yield, white solid, mp = 108-110 °C;  $^1\text{H}$  NMR (400 MHz,  $\text{CDCl}_3$ )  $\delta$  8.08 (d,  $J$  = 5.6 Hz, 1H), 7.67-7.65 (m, 1H), 7.23-7.21 (m, 2H), 4.09 (s, 2H), 3.53 (s, 3H), 3.13-3.05 (m, 2H), 1.88-1.77 (m, 2H), 1.54-1.41 (m, 5H), 1.03-0.94 (m, 3H);  $^{13}\text{C}$  NMR (101 MHz,  $\text{CDCl}_3$ )  $\delta$  194.8, 172.1, 143.0, 136.5, 128.6, 123.3, 119.1, 115.1, 58.2, 56.8, 55.7, 30.1, 25.6, 23.8, 21.6, 13.6. HRMS (ESI):  $m/z$  calcd for  $\text{C}_{16}\text{H}_{22}\text{NO}_4\text{S}$   $[\text{M}+\text{H}]^+$ : 324.1264; found: 324.1272.

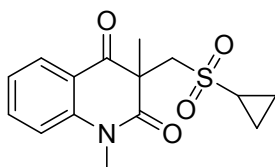

**3-((cyclopropylsulfonyl)methyl)-1,3-dimethylquinoline-2,4(1H,3H)-dione (3m):** 73% yield, white solid, mp = 153-155 °C;  $^1\text{H}$  NMR (400 MHz,  $\text{CDCl}_3$ )  $\delta$  8.08 (d,  $J$  = 7.1 Hz, 1H), 7.68-7.65 (m, 1H), 7.23-7.19 (m, 2H), 4.21 (s, 2H), 3.53 (s, 3H), 2.63 (bs, 1H), 1.46 (s, 3H), 1.20 (bs, 2H), 1.10 (d,  $J$  = 8.1 Hz, 2H);  $^{13}\text{C}$  NMR (101 MHz,  $\text{CDCl}_3$ )  $\delta$  194.8, 172.1, 143.0, 136.5, 128.6, 123.3, 119.1, 115.1, 59.9, 55.7, 33.3, 30.1, 25.6, 5.1, 5.0. HRMS (ESI):  $m/z$  calcd for  $\text{C}_{15}\text{H}_{18}\text{NO}_4\text{S}$   $[\text{M}+\text{H}]^+$ : 308.0951; found: 308.0959.

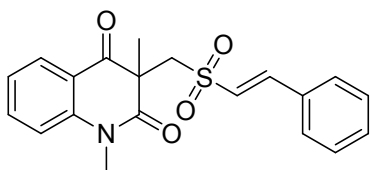

**(E)-1,3-dimethyl-3-((styrylsulfonyl)methyl)quinoline-2,4(1H,3H)-dione (3n):** 23% yield, yellow solid, mp = 63-65 °C;  $^1\text{H}$  NMR (400 MHz,  $\text{CDCl}_3$ )  $\delta$  8.10 (d,  $J$  = 11.4 Hz, 1H), 7.71-7.65 (m, 1H), 7.53-7.40 (m, 6H), 7.26-7.21 (m, 2H), 6.92 (d,  $J$  = 15.2 Hz, 1H), 4.23 (s, 2H), 3.54 (s, 3H), 1.48 (s, 3H). HRMS (ESI):  $m/z$  calcd for  $\text{C}_{20}\text{H}_{20}\text{NO}_4\text{S}$   $[\text{M}+\text{H}]^+$ : 370.1108; found: 370.1118.

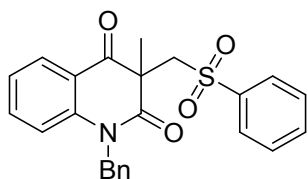

**1-benzyl-3-methyl-3-((phenylsulfonyl)methyl)quinoline-2,4(1H,3H)-dione (3p):** 81% yield, light yellow solid, mp = 163-165 °C; <sup>1</sup>H NMR (400 MHz, CDCl<sub>3</sub>) δ 8.13 (dd, *J* = 9.2 Hz, *J* = 1.2 Hz, 1H), 7.89 (d, *J* = 7.5 Hz, 2H), 7.63 (t, *J* = 7.5 Hz, 1H), 7.56-7.49 (m, 3H), 7.40-7.33 (m, 4H), 7.28-7.25 (m, 1H), 7.18 (t, *J* = 7.3 Hz, 1H), 7.11 (d, *J* = 8.3 Hz, 1H), 5.40 (t, *J* = 17.5 Hz, 2H), 4.35 (s, 2H), 1.53 (s, 3H); <sup>13</sup>C NMR (101 MHz, CDCl<sub>3</sub>) δ 194.1, 172.3, 142.3, 141.8, 136.4, 135.9, 133.6, 129.0, 129.0, 128.8, 127.8, 127.4, 126.4, 123.4, 119.4, 116.2, 62.1, 55.8, 46.4, 25.9. HRMS (ESI): *m/z* calcd for C<sub>24</sub>H<sub>22</sub>NO<sub>4</sub>S [M+H]<sup>+</sup>: 420.1264; found: 420.1274.

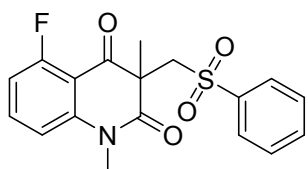

**5-fluoro-1,3-dimethyl-3-((phenylsulfonyl)methyl)quinoline-2,4(1H,3H)-dione (3r):** 93% yield, white solid, mp = 138-140 °C; <sup>1</sup>H NMR (400 MHz, CDCl<sub>3</sub>) δ 7.87 (d, *J* = 7.5 Hz, 2H), 7.65-7.52 (m, 4H), 7.05 (d, *J* = 8.7 Hz, 1H), 6.91 (t, *J* = 9.5 Hz, 1H), 4.21 (q, *J* = 13.1 Hz, 2H), 3.54 (s, 3H), 1.43 (s, 3H); <sup>13</sup>C NMR (101 MHz, CDCl<sub>3</sub>) δ 191.5, 171.3, 162.7 (d, <sup>1</sup>*J*<sub>FC</sub> = 267.1 Hz, 1C), 144.2 (d, <sup>3</sup>*J*<sub>FC</sub> = 3.1 Hz, 1C), 141.7, 136.8 (d, <sup>3</sup>*J*<sub>FC</sub> = 11.9 Hz, 1C), 133.6, 129.1, 127.8, 111.5 (d, <sup>2</sup>*J*<sub>FC</sub> = 21.4 Hz, 1C), 111.1 (d, <sup>4</sup>*J*<sub>FC</sub> = 3.6 Hz, 1C), 109.0 (d, <sup>2</sup>*J*<sub>FC</sub> = 9.0 Hz, 1C), 61.7, 56.4, 31.0, 25.4. HRMS (ESI): *m/z* calcd for C<sub>18</sub>H<sub>17</sub>FNO<sub>4</sub>S [M+H]<sup>+</sup>: 362.0857; found: 362.0867.

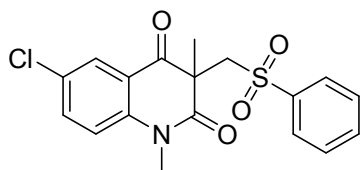

**6-chloro-1,3-dimethyl-3-((phenylsulfonyl)methyl)quinoline-2,4(1H,3H)-dione (3s):** 93% yield, white solid, mp = 142-144 °C; <sup>1</sup>H NMR (400 MHz, CDCl<sub>3</sub>) δ 8.04 (d, *J* = 2.8 Hz, 1H), 7.85-7.80 (m, 2H), 7.66-7.58 (m, 2H), 7.57-7.51 (m, 2H), 7.20 (d, *J* = 8.9 Hz, 1H), 4.23 (m, 2H), 3.52 (s, 3H), 1.42 (s, 3H); <sup>13</sup>C NMR (101 MHz, CDCl<sub>3</sub>) δ 193.3, 171.4, 141.7, 141.4, 136.1, 133.7, 129.1, 129.0, 128.0, 127.7, 62.3, 55.3, 30.3, 25.7. HRMS (ESI): *m/z* calcd for C<sub>18</sub>H<sub>17</sub>ClNO<sub>4</sub>S [M+H]<sup>+</sup>: 378.0561; found: 378.0570.

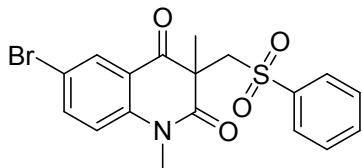

**6-bromo-1,3-dimethyl-3-((phenylsulfonyl)methyl)quinoline-2,4(1H,3H)-dione (3t):** 85% yield, light yellow solid, mp = 148-150 °C;  $^1\text{H}$  NMR (400 MHz,  $\text{CDCl}_3$ )  $\delta$  8.20 (d,  $J = 2.5$  Hz, 1H), 7.83 (d,  $J = 7.7$  Hz, 2H), 7.76 (dd,  $J = 8.7$  Hz,  $J = 2.5$  Hz, 1H), 7.65 (t,  $J = 7.3$  Hz, 2H), 7.55 (t,  $J = 7.7$  Hz, 2H), 7.15 (d,  $J = 8.7$  Hz, 1H), 4.24 (dd,  $J = 13.9$  Hz,  $J = 1.7$  Hz, 2H), 3.53 (s, 3H), 1.42 (s, 3H);  $^{13}\text{C}$  NMR (101 MHz,  $\text{CDCl}_3$ )  $\delta$  193.2, 171.4, 142.1, 141.4, 139.0, 133.7, 131.1, 129.1, 127.8, 120.5, 117.2, 116.4, 62.3, 55.3, 30.3, 25.7. HRMS (ESI):  $m/z$  calcd for  $\text{C}_{18}\text{H}_{17}\text{BrNO}_4\text{S}$   $[\text{M}+\text{H}]^+$ : 422.0056; found: 422.0069.

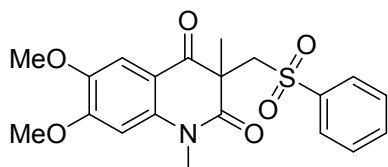

**6,7-dimethoxy-1,3-dimethyl-3-((phenylsulfonyl)methyl)quinoline-2,4(1H,3H)-dione (3u):** 71% yield, light yellow solid, mp = 186-188 °C;  $^1\text{H}$  NMR (400 MHz,  $\text{CDCl}_3$ )  $\delta$  7.83 (d,  $J = 7.9$  Hz, 2H), 7.62 (t,  $J = 7.3$  Hz, 1H), 7.55-7.50 (m, 3H), 6.67 (s, 1H), 4.20 (dd,  $J = 14.1$  Hz,  $J = 3.9$  Hz, 2H), 4.02 (s, 3H), 3.94 (s, 3H), 3.54 (s, 3H), 1.42 (s, 3H);  $^{13}\text{C}$  NMR (101 MHz,  $\text{CDCl}_3$ )  $\delta$  192.8, 172.1, 156.0, 145.4, 141.4, 139.4, 133.5, 129.0, 127.8, 111.9, 109.2, 98.4, 62.3, 56.4, 54.5, 30.2, 26.5. HRMS (ESI):  $m/z$  calcd for  $\text{C}_{20}\text{H}_{22}\text{NO}_6\text{S}$   $[\text{M}+\text{H}]^+$ : 404.1162; found: 404.1173.



# NMR Spectra:

## 3a

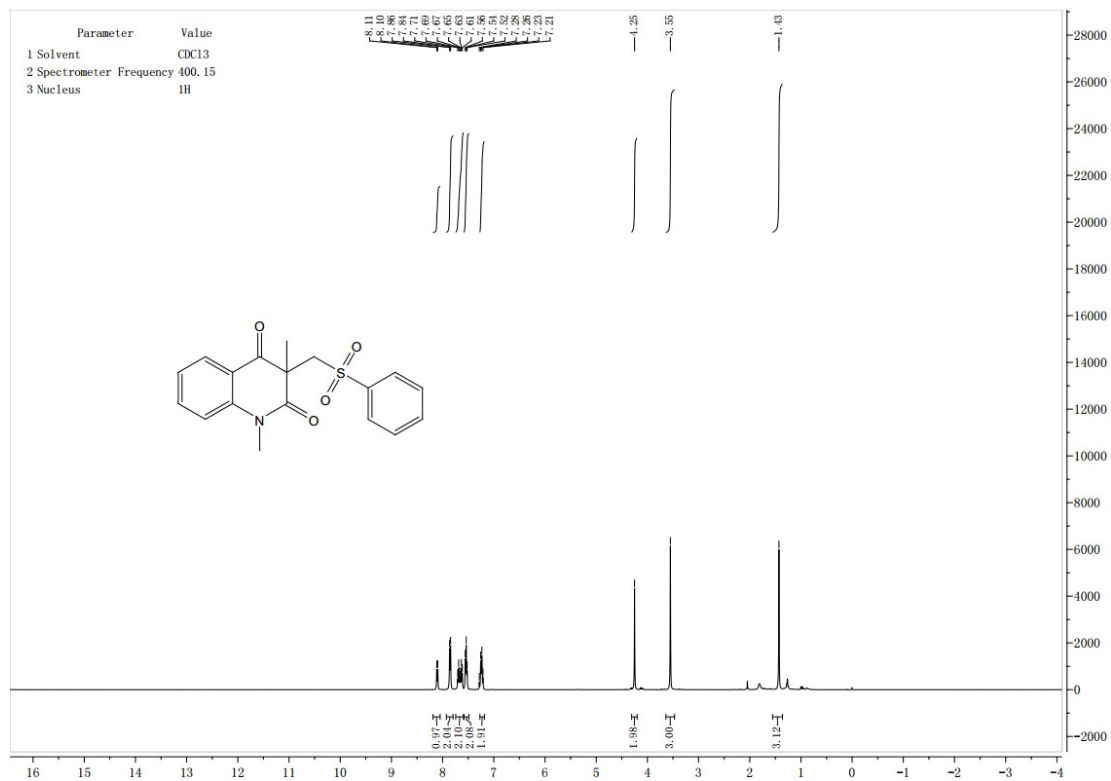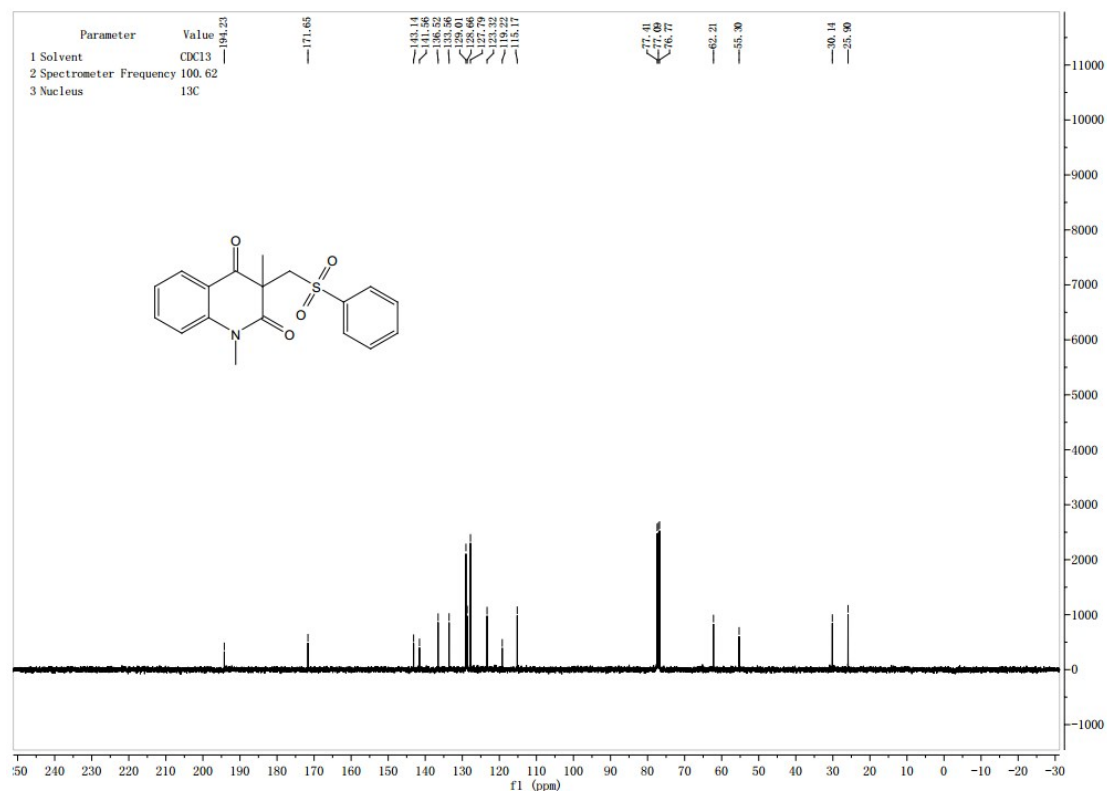

3b

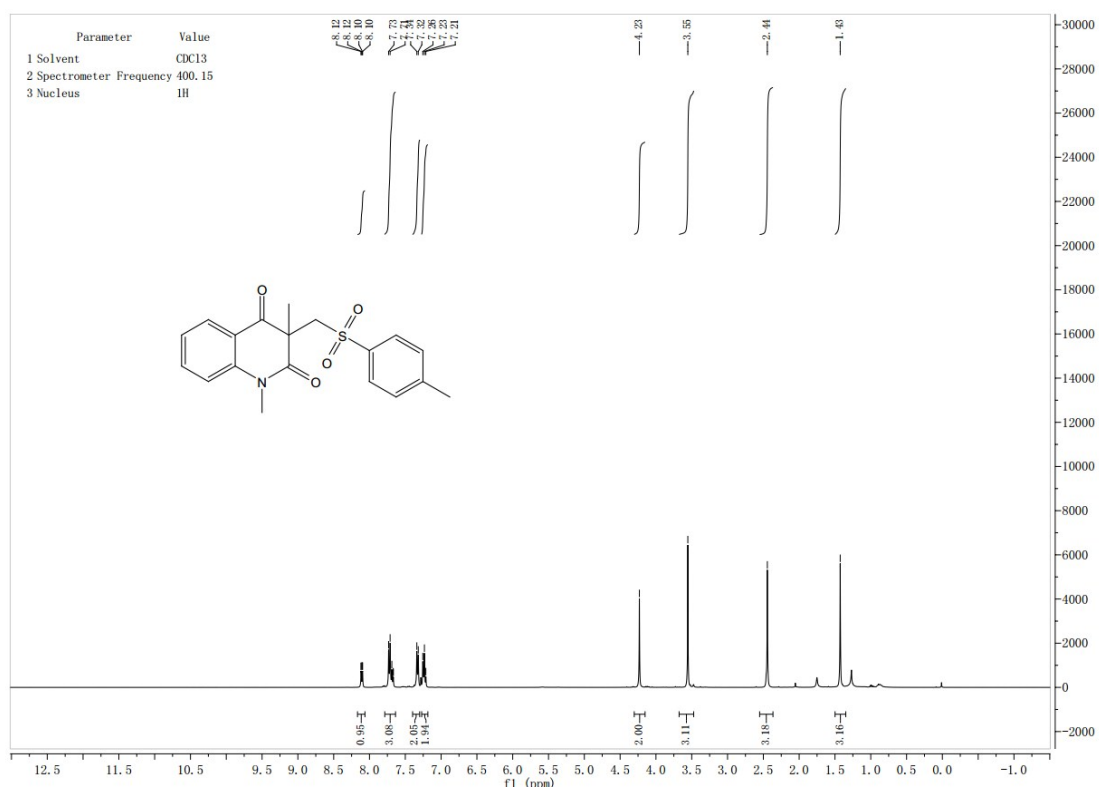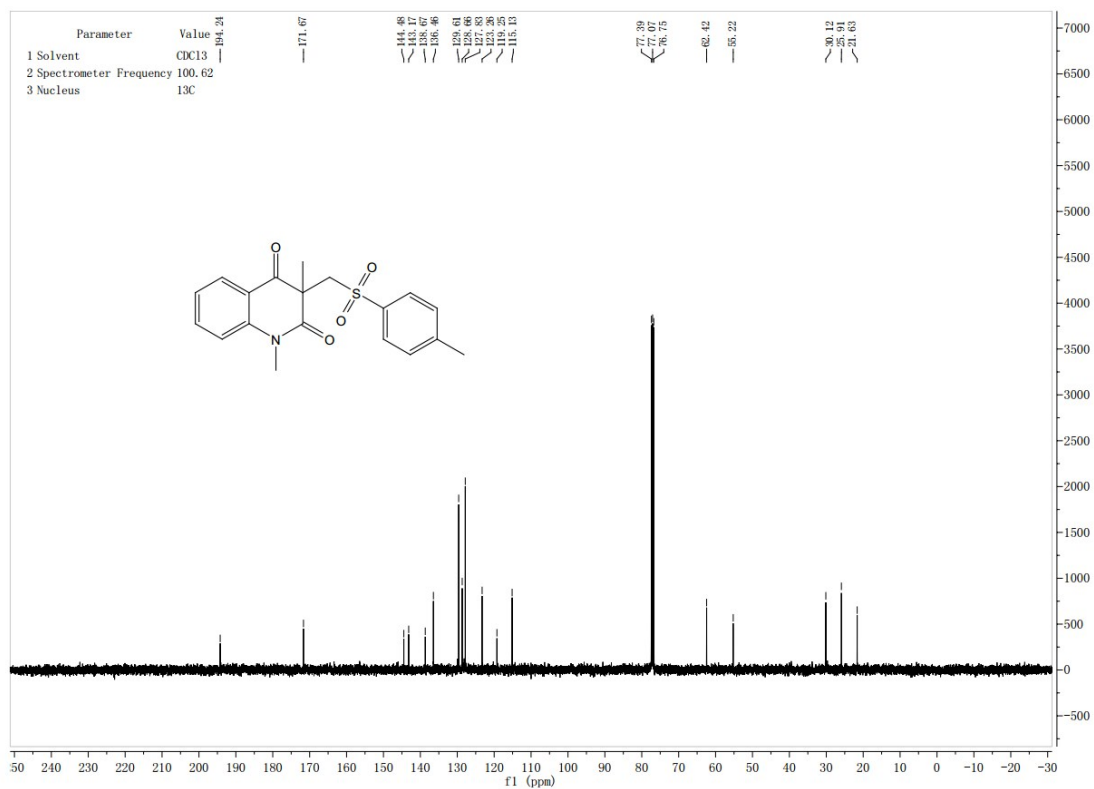

3c

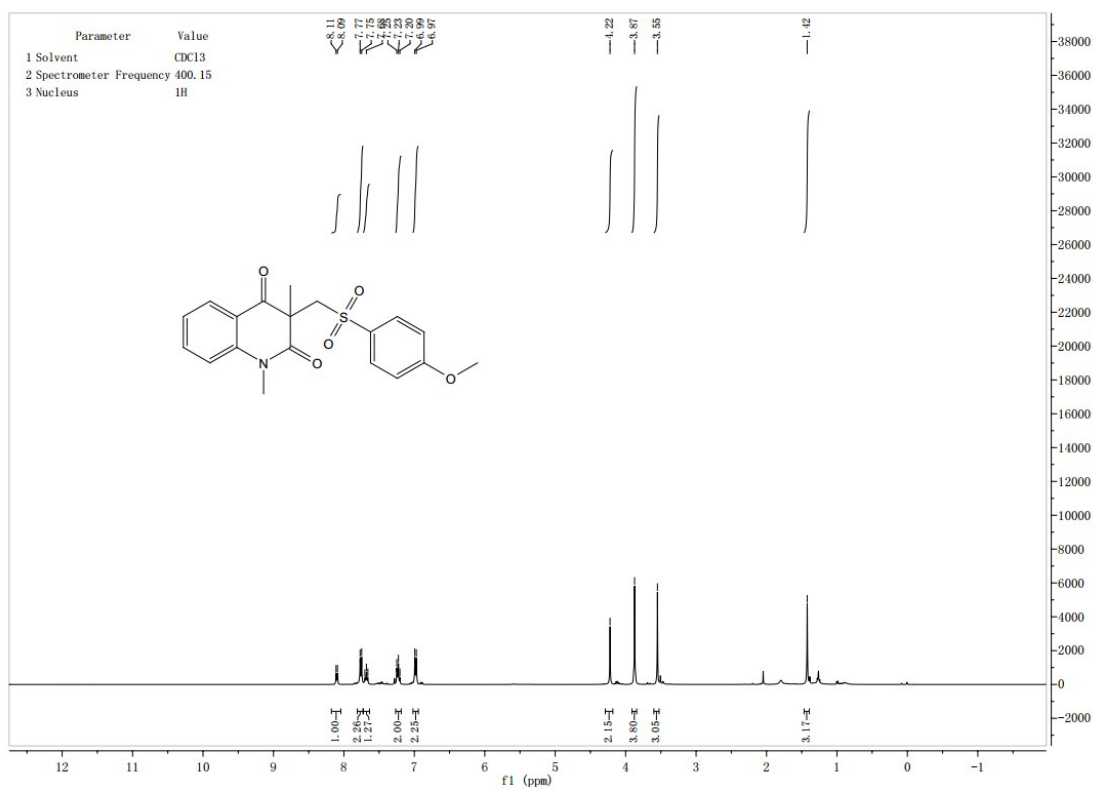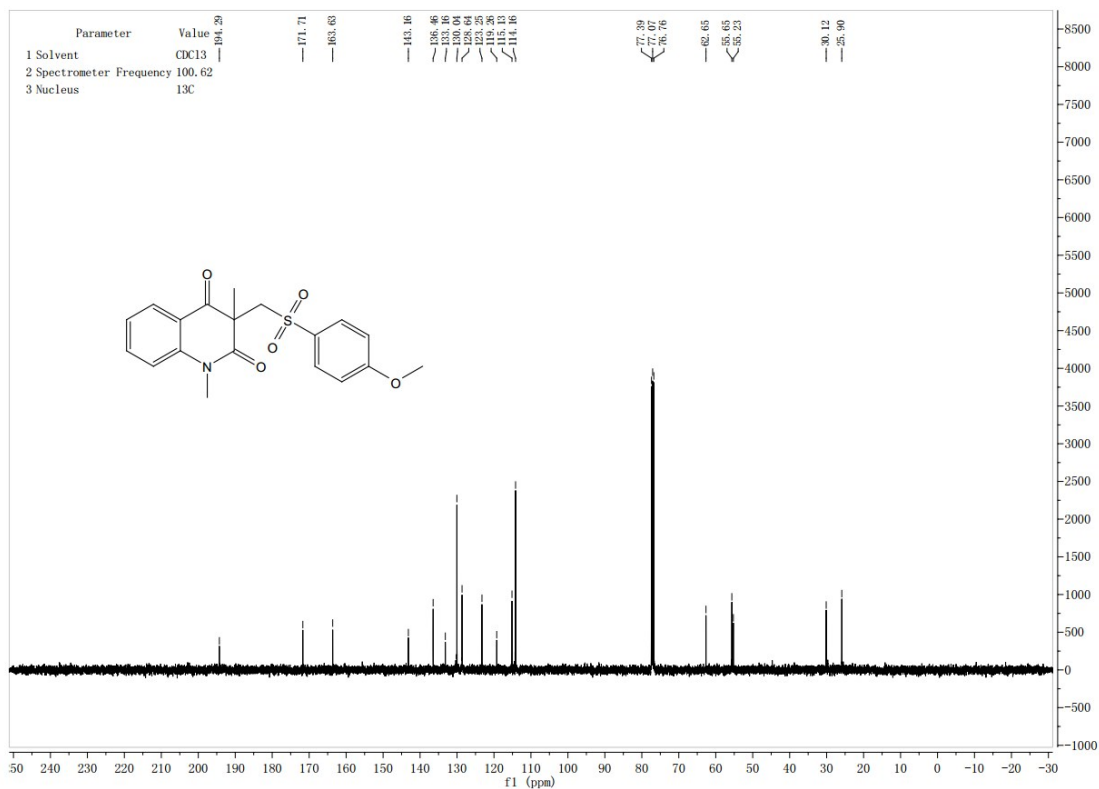

3d

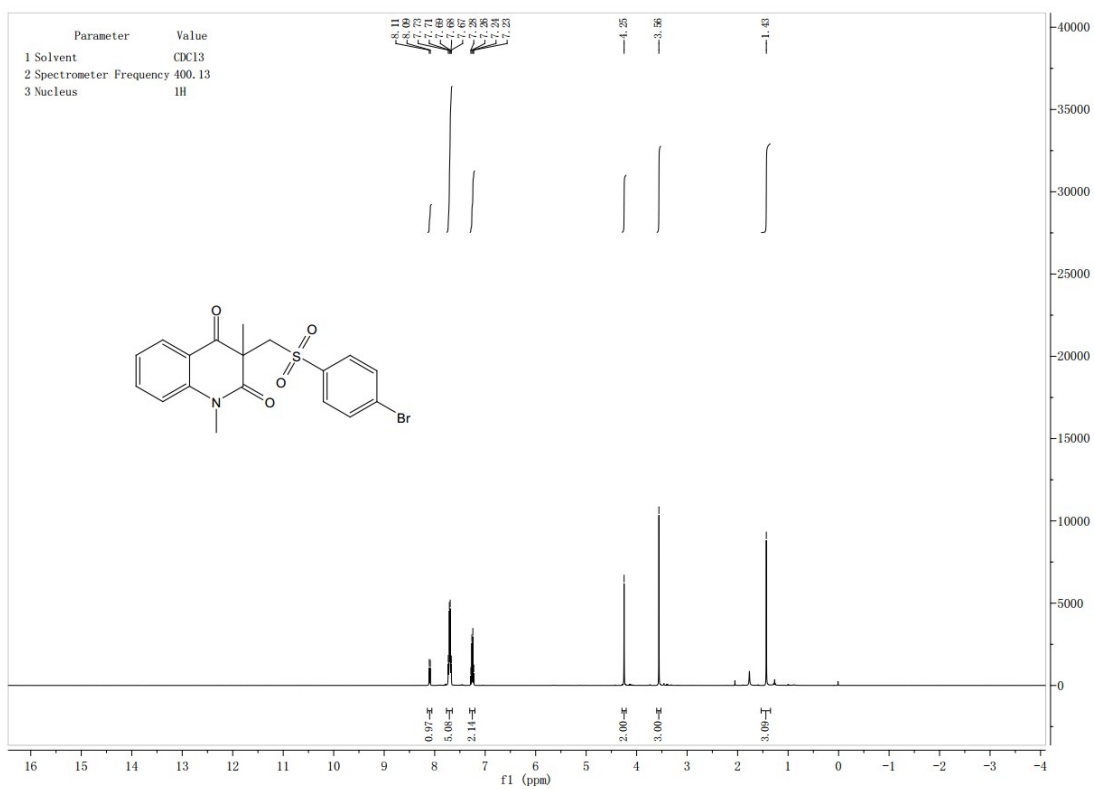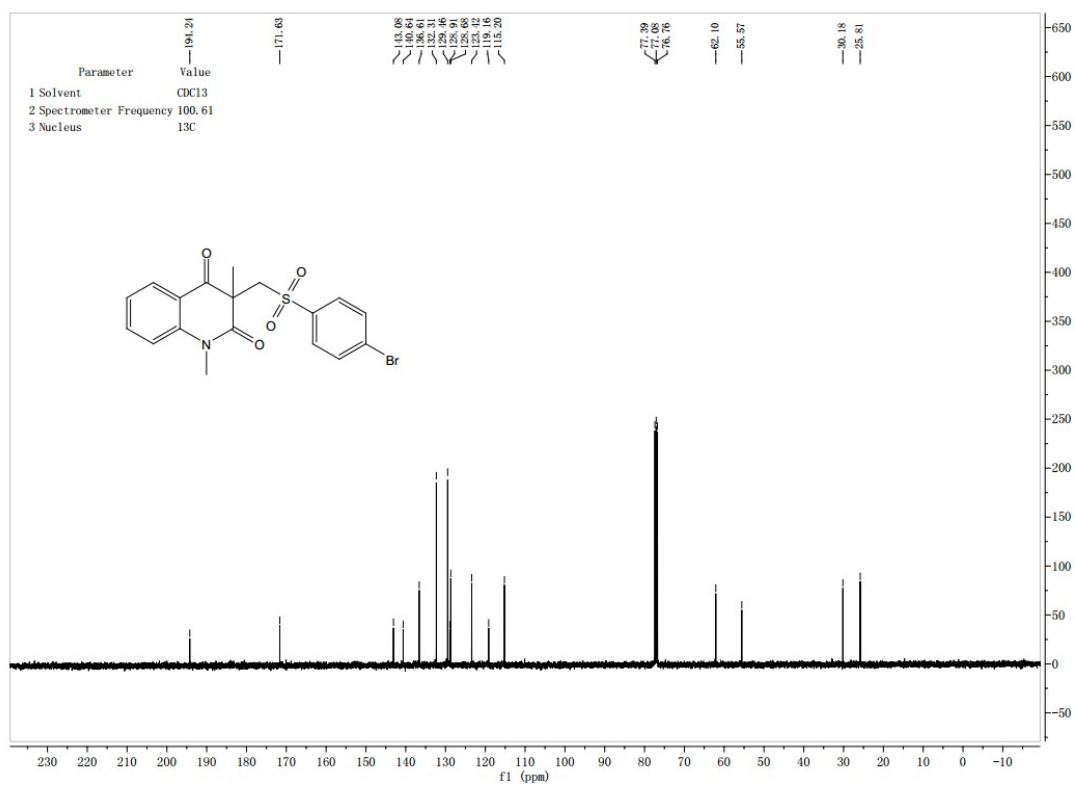

3e

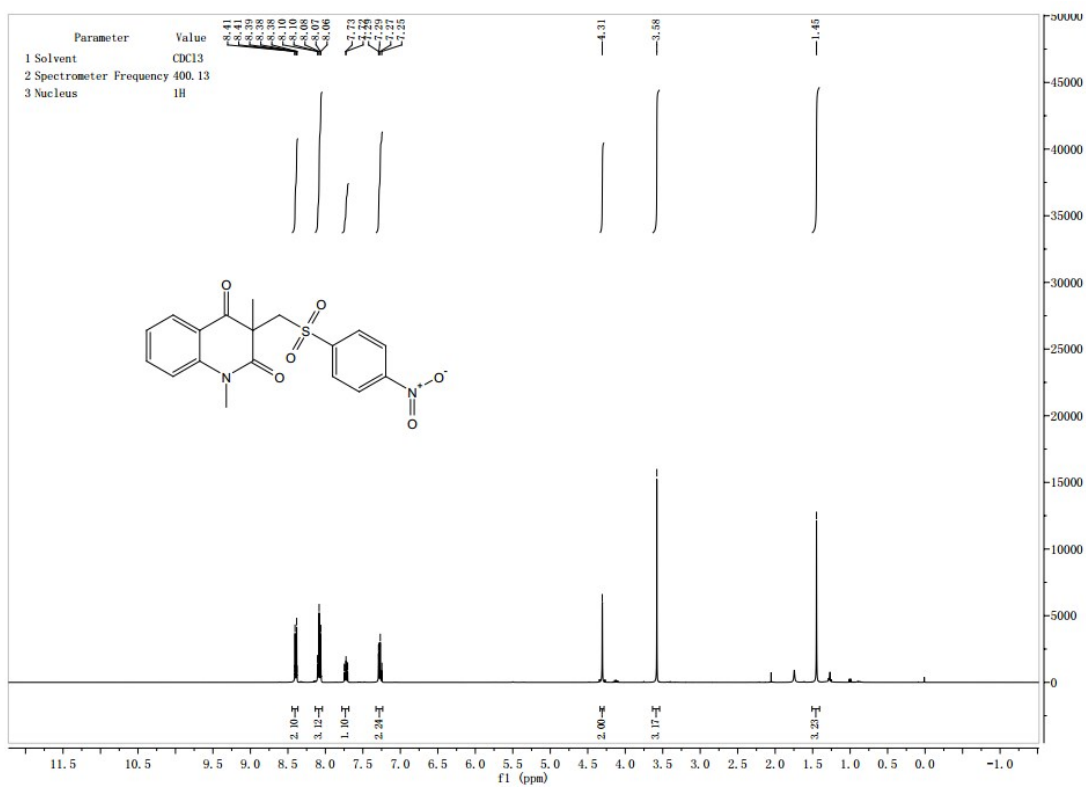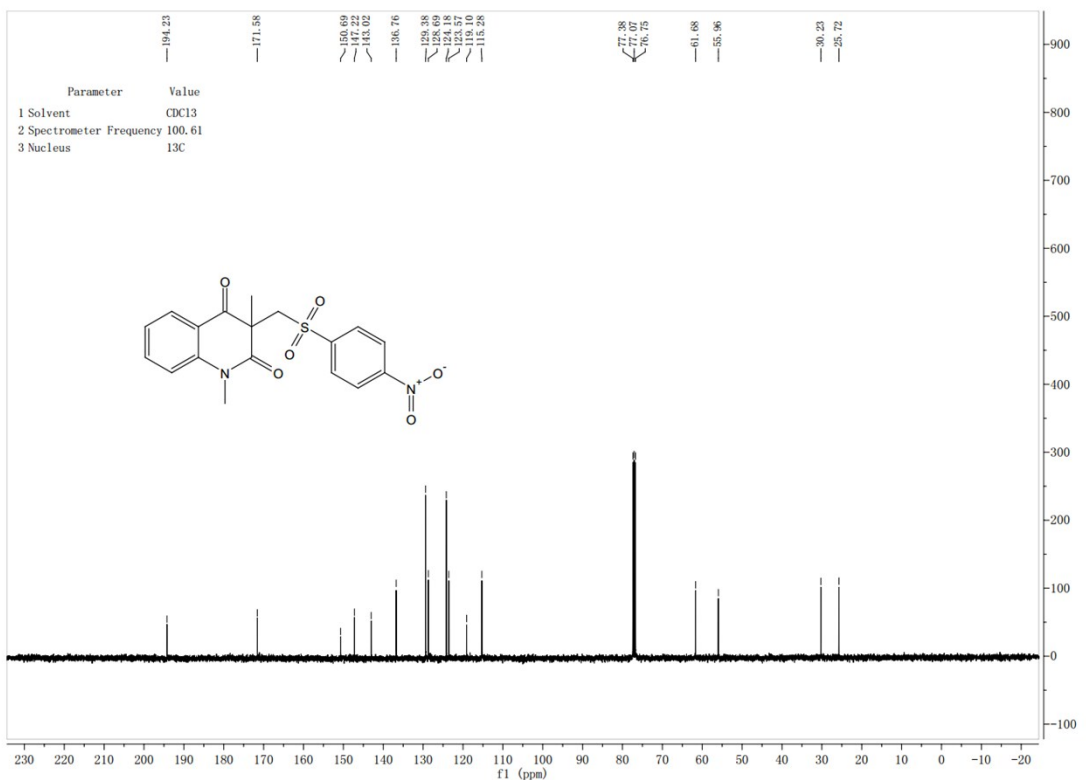

3f

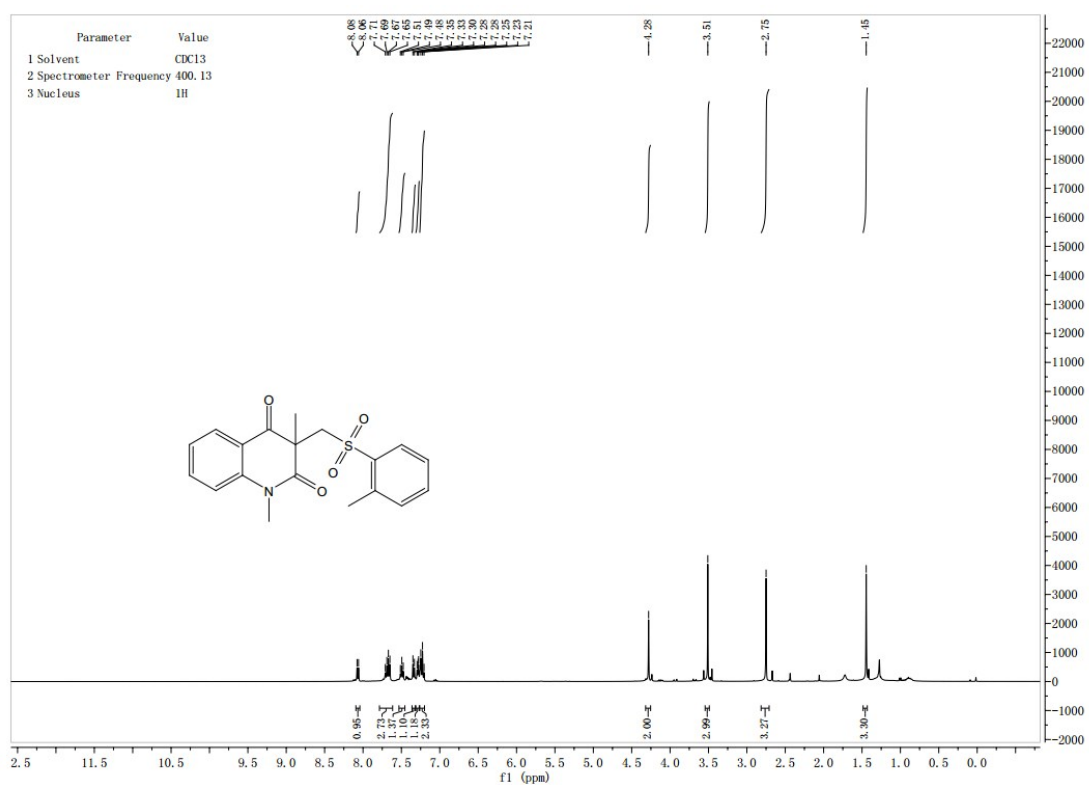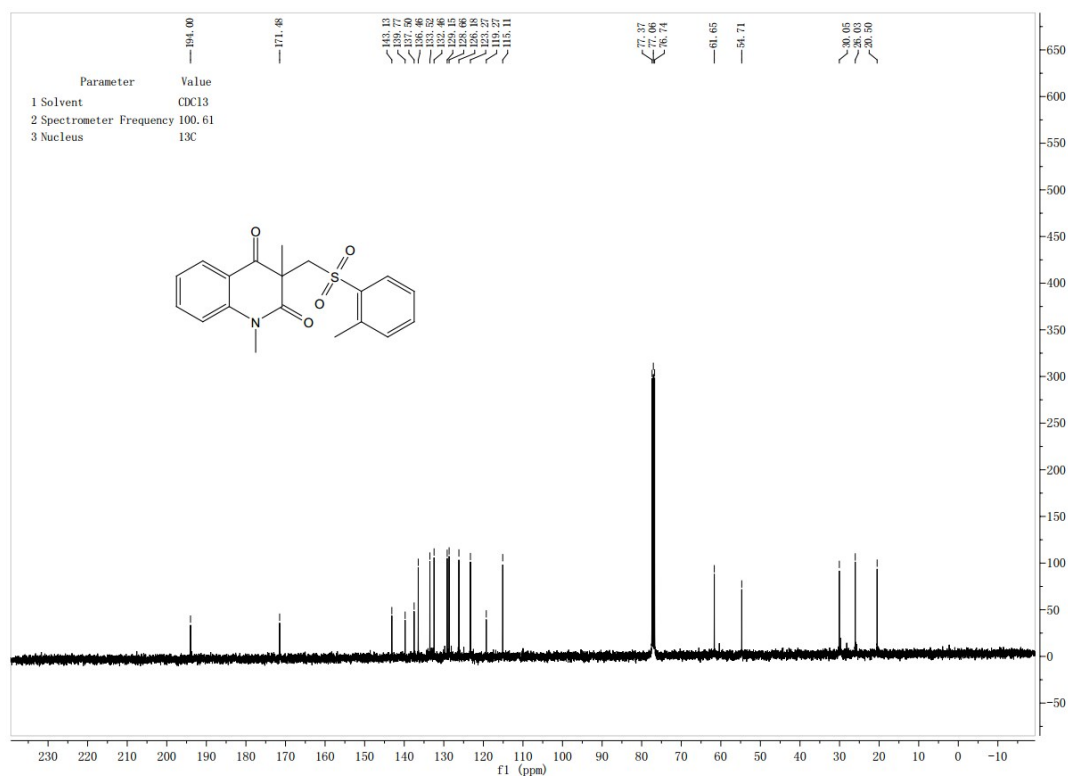

3g

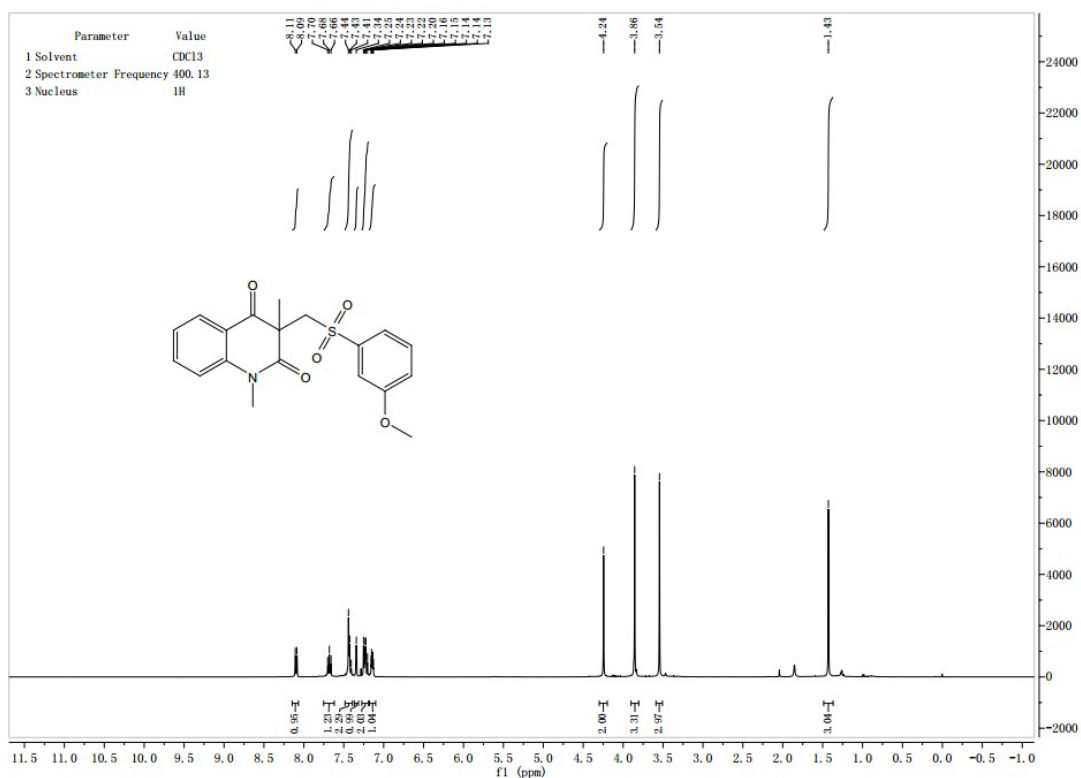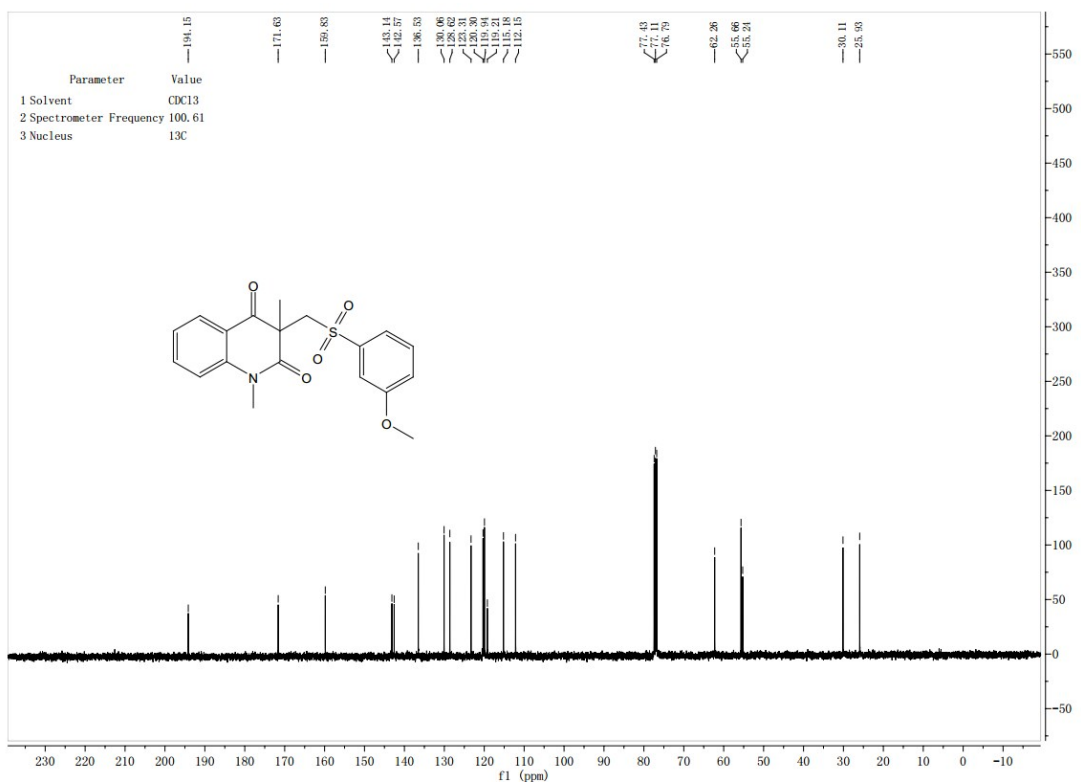

3h

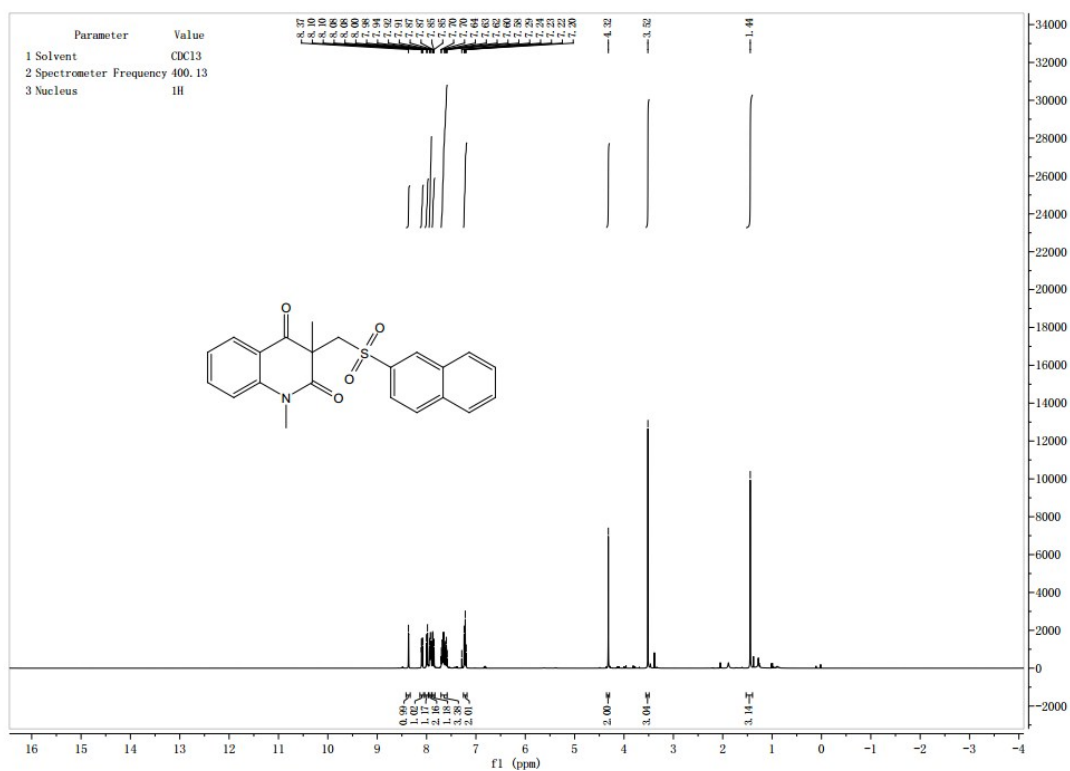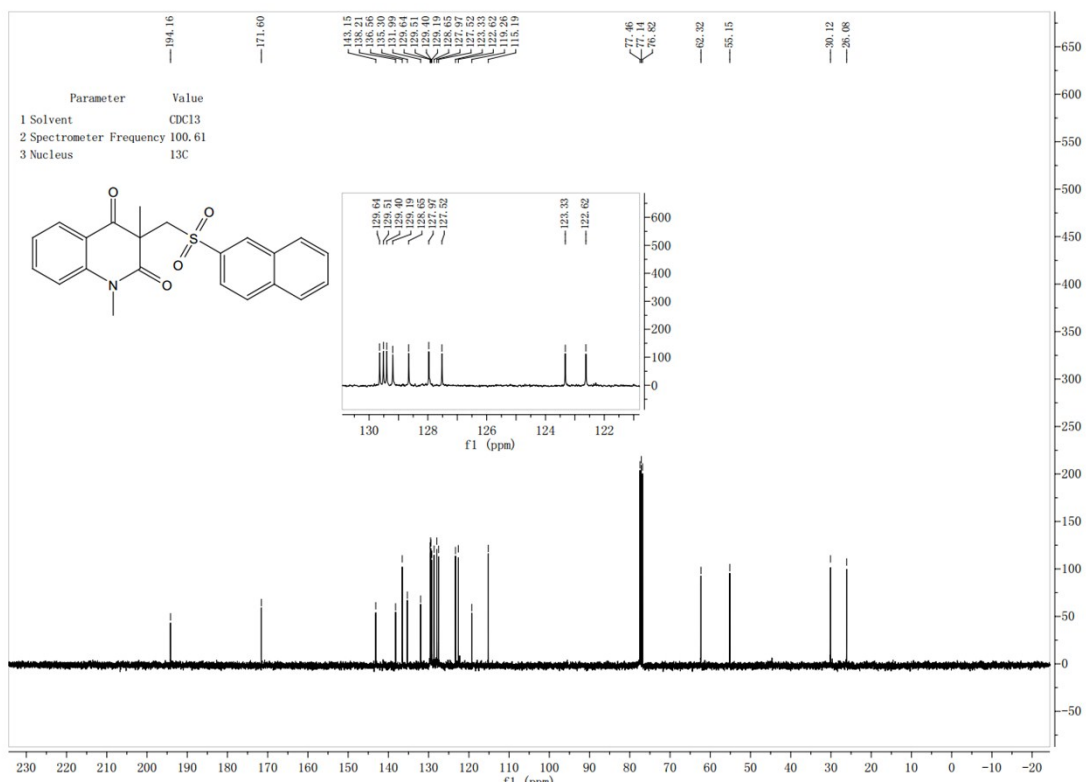



3i

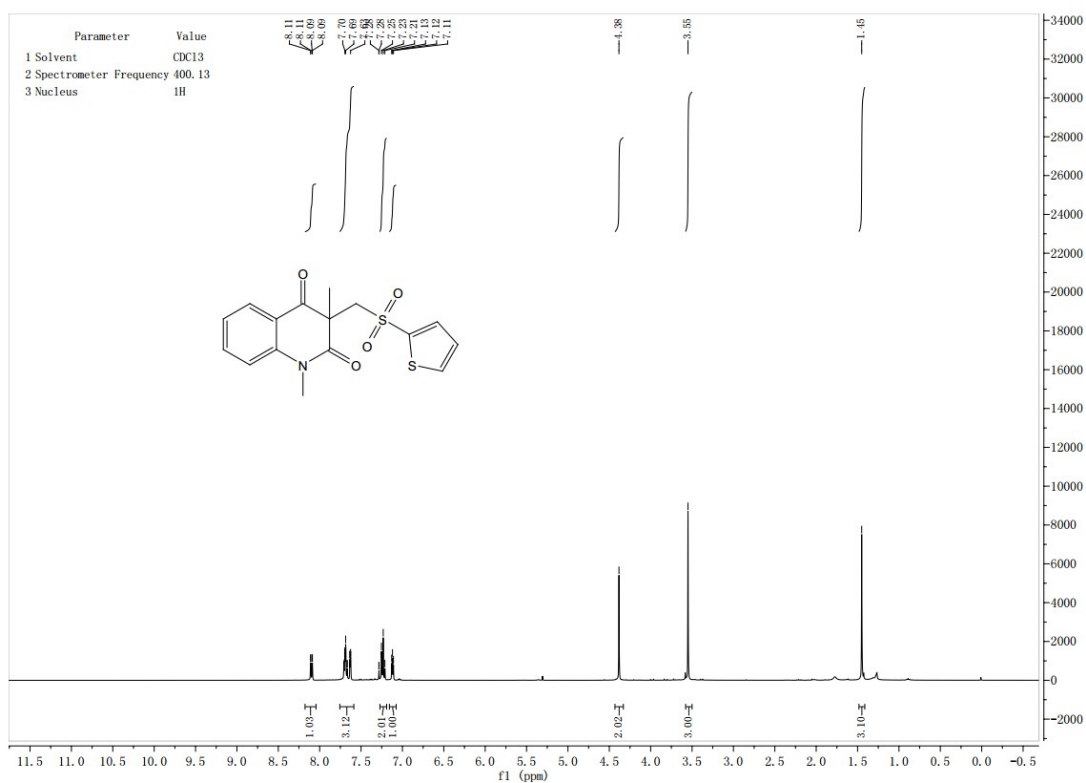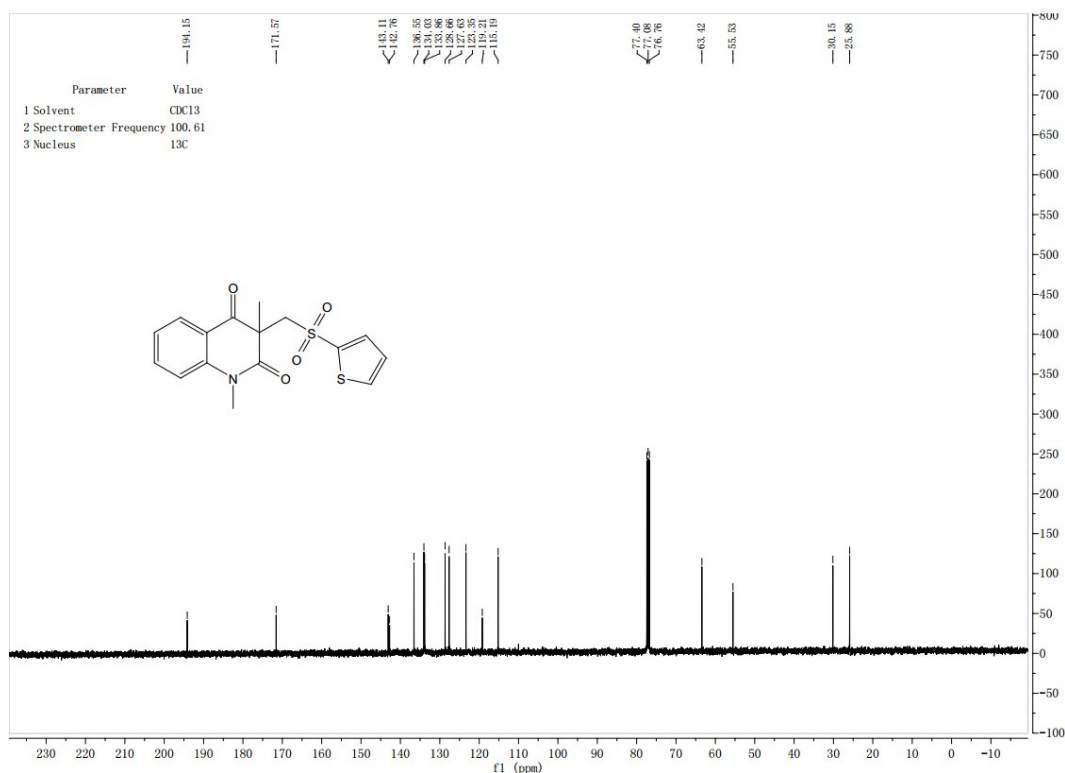



3k

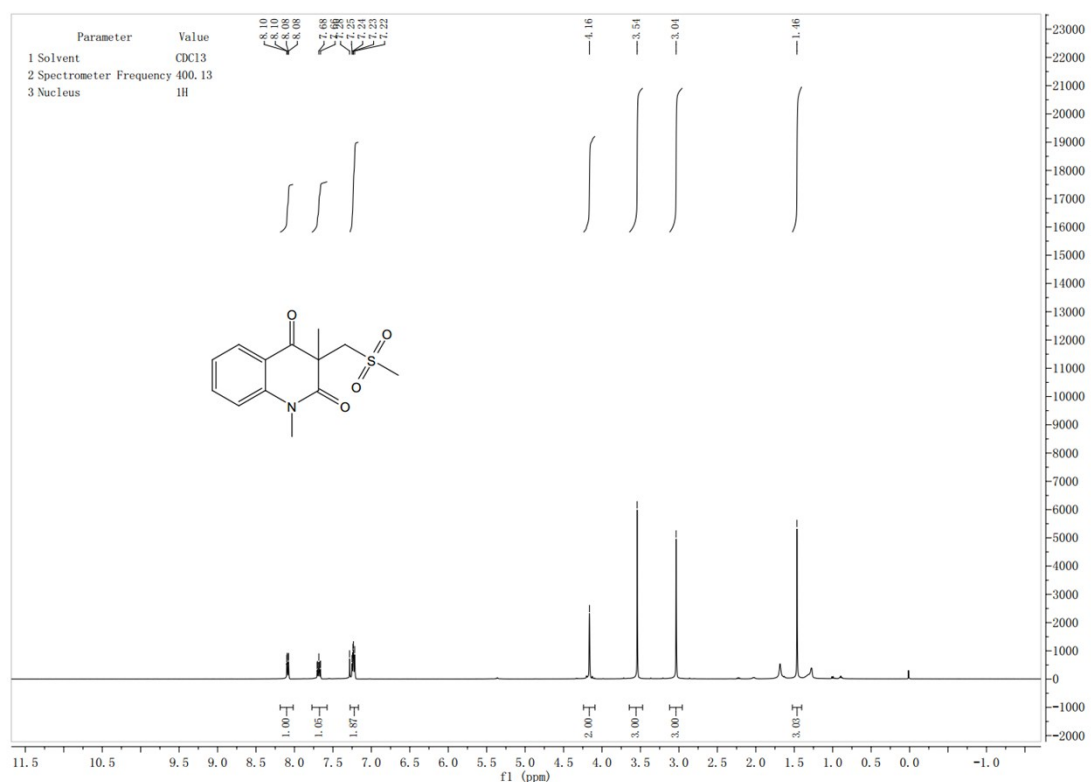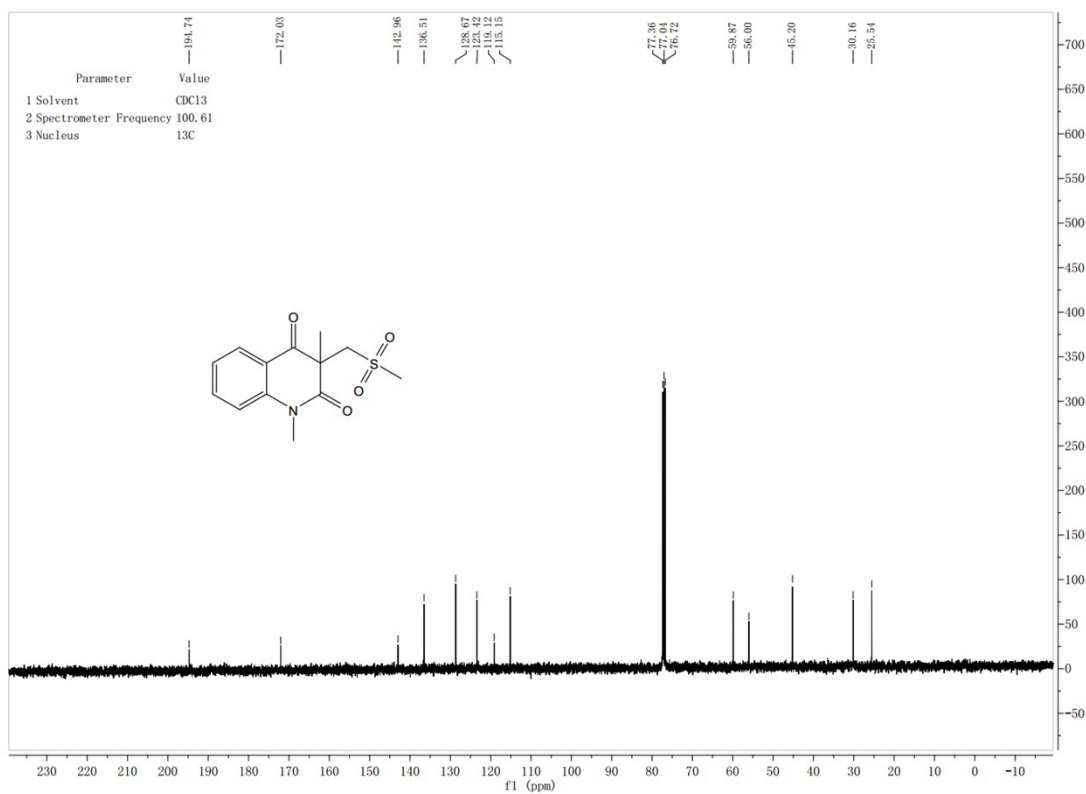

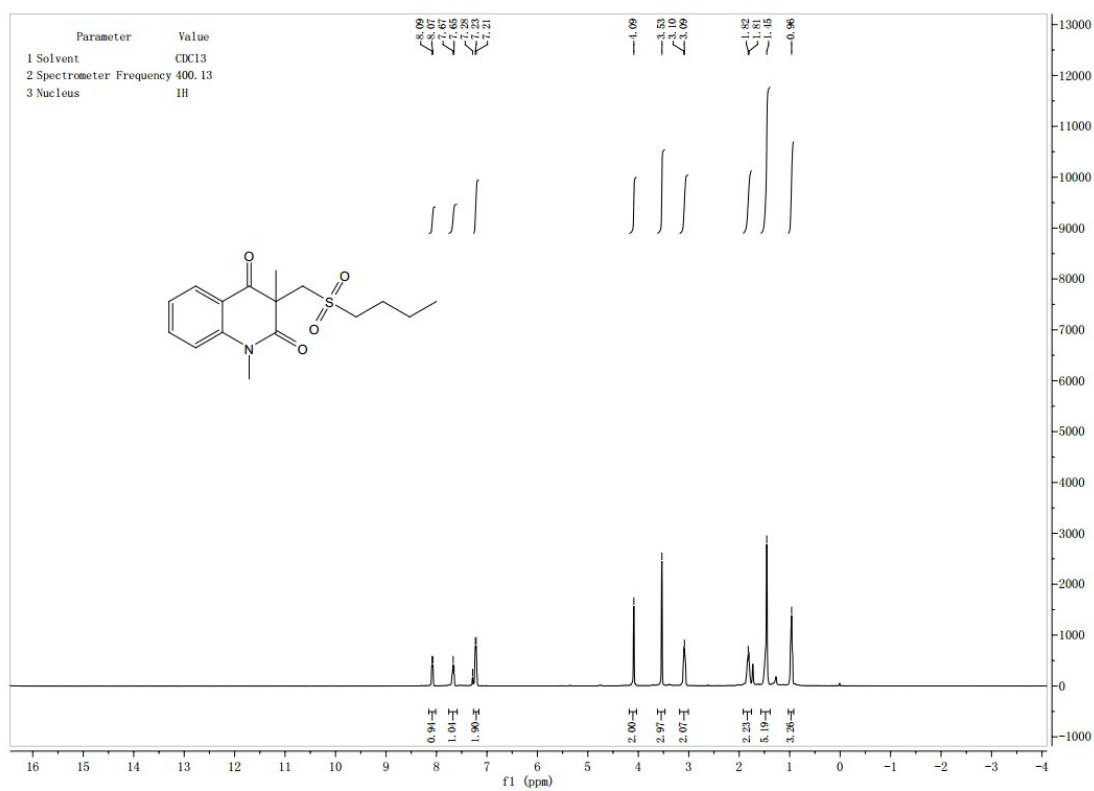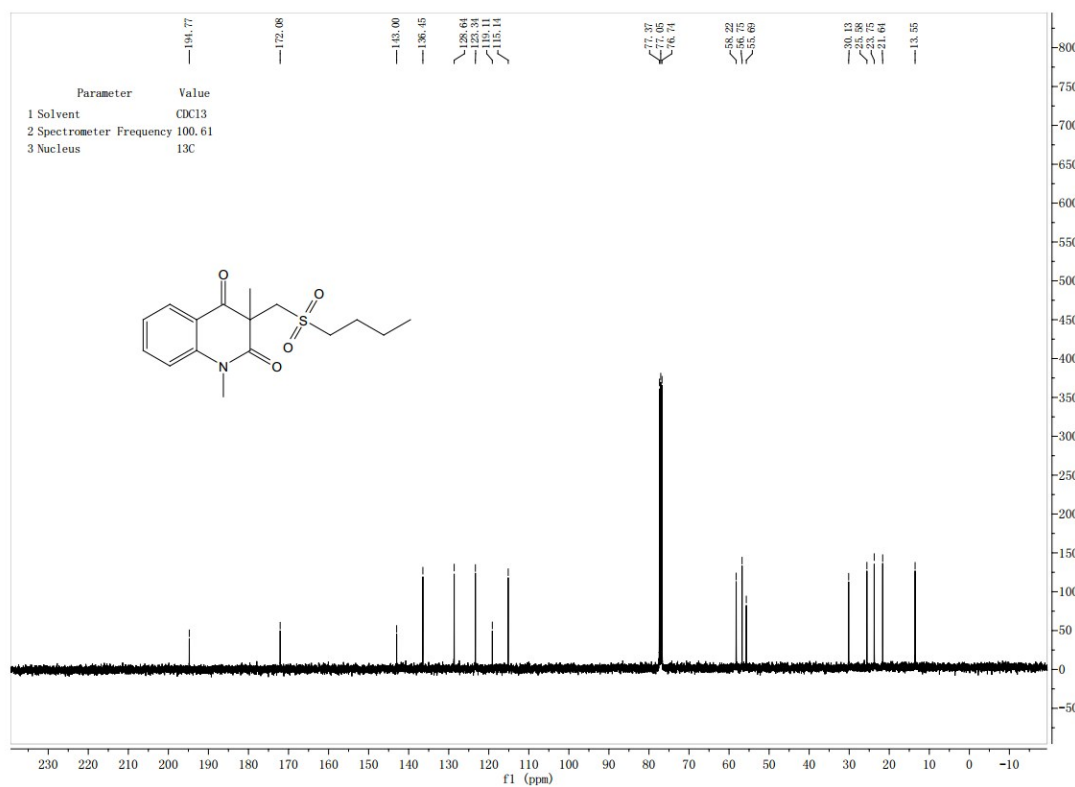

3m

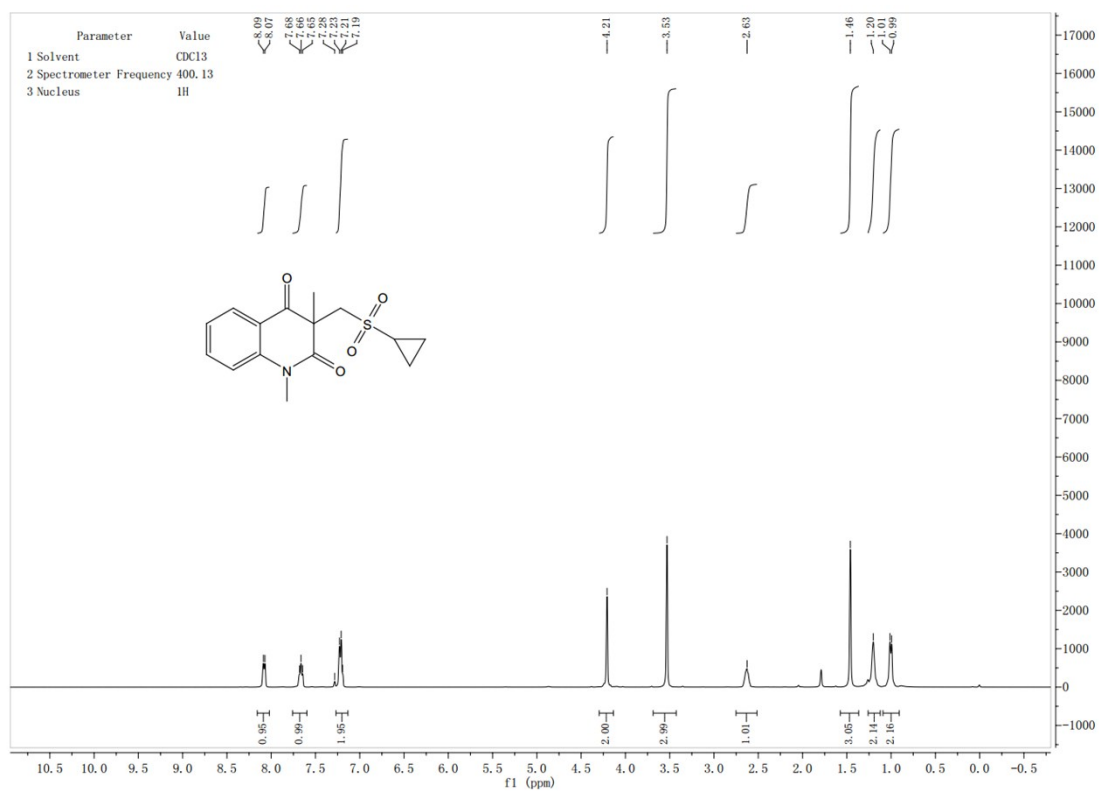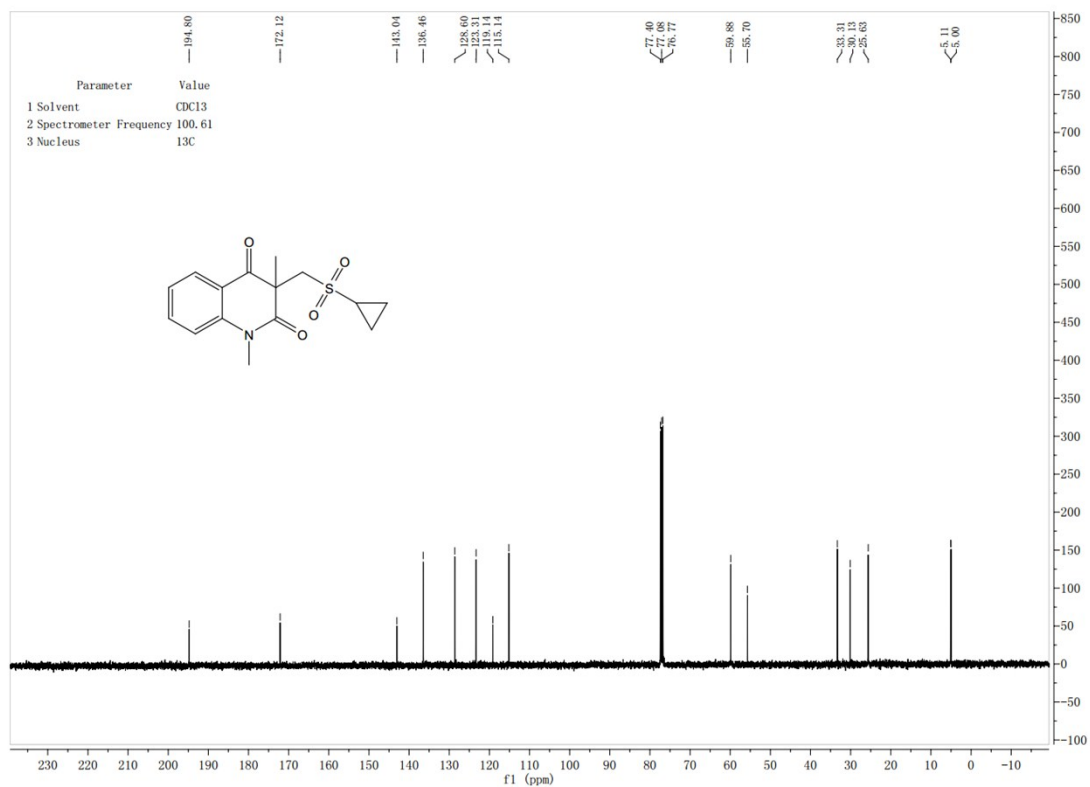

3n

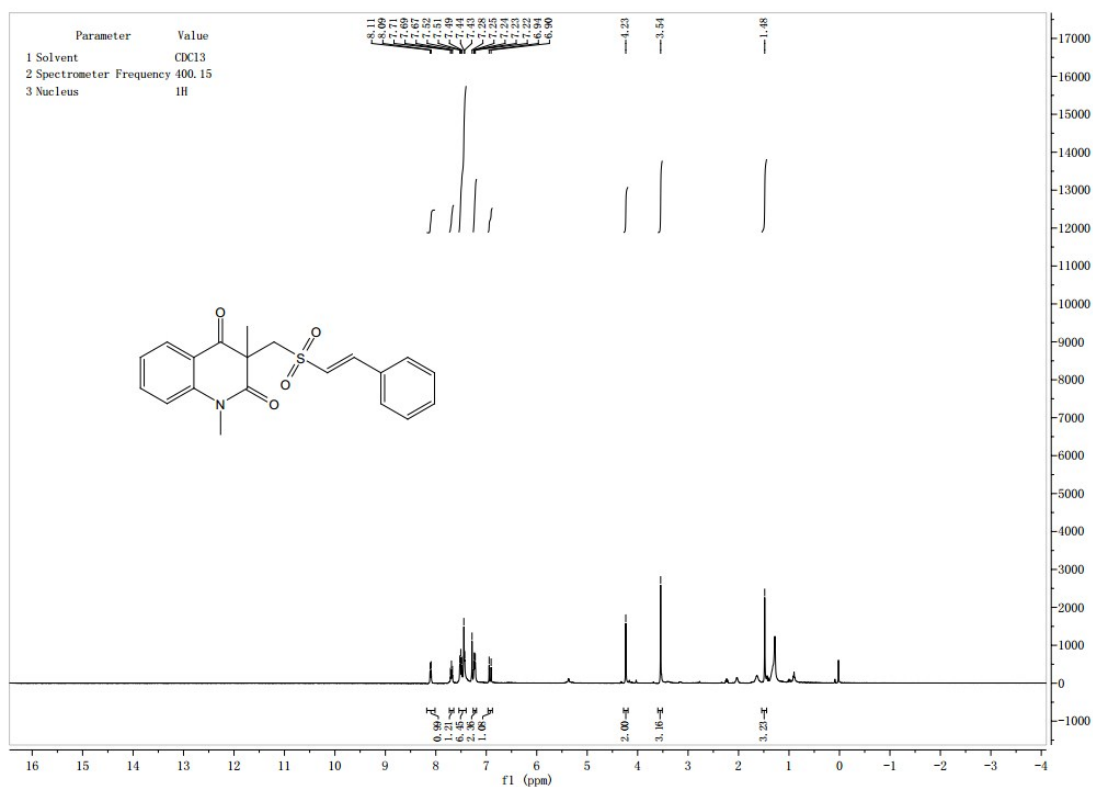

3p

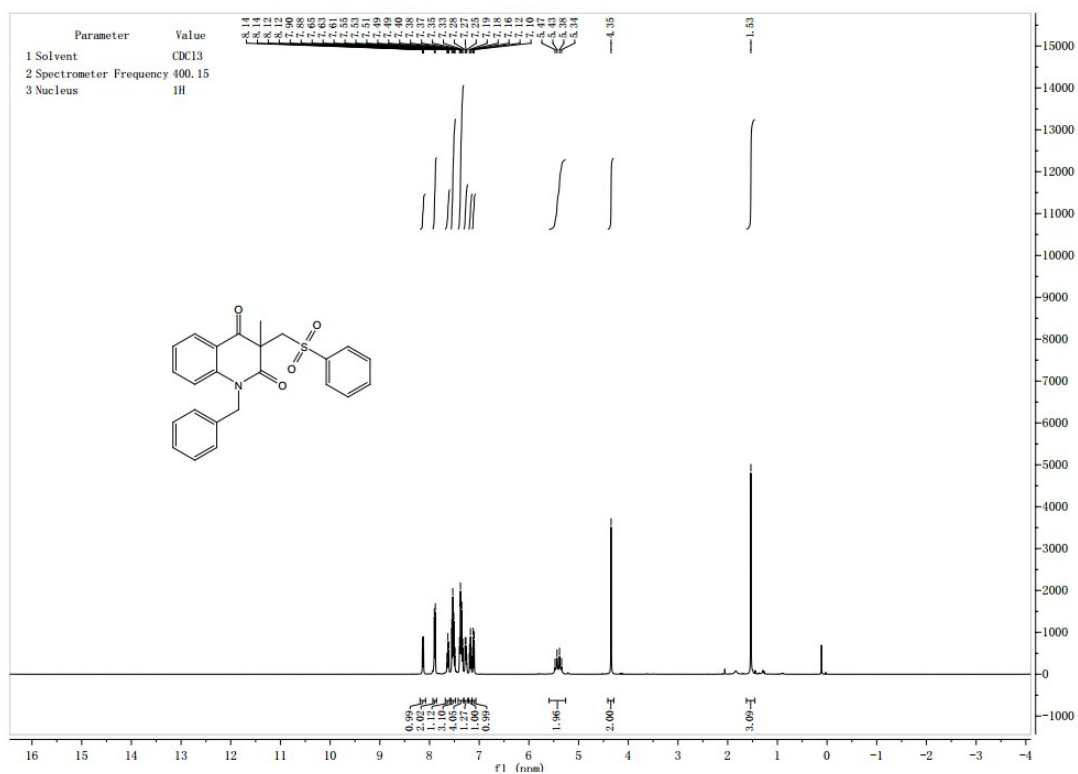



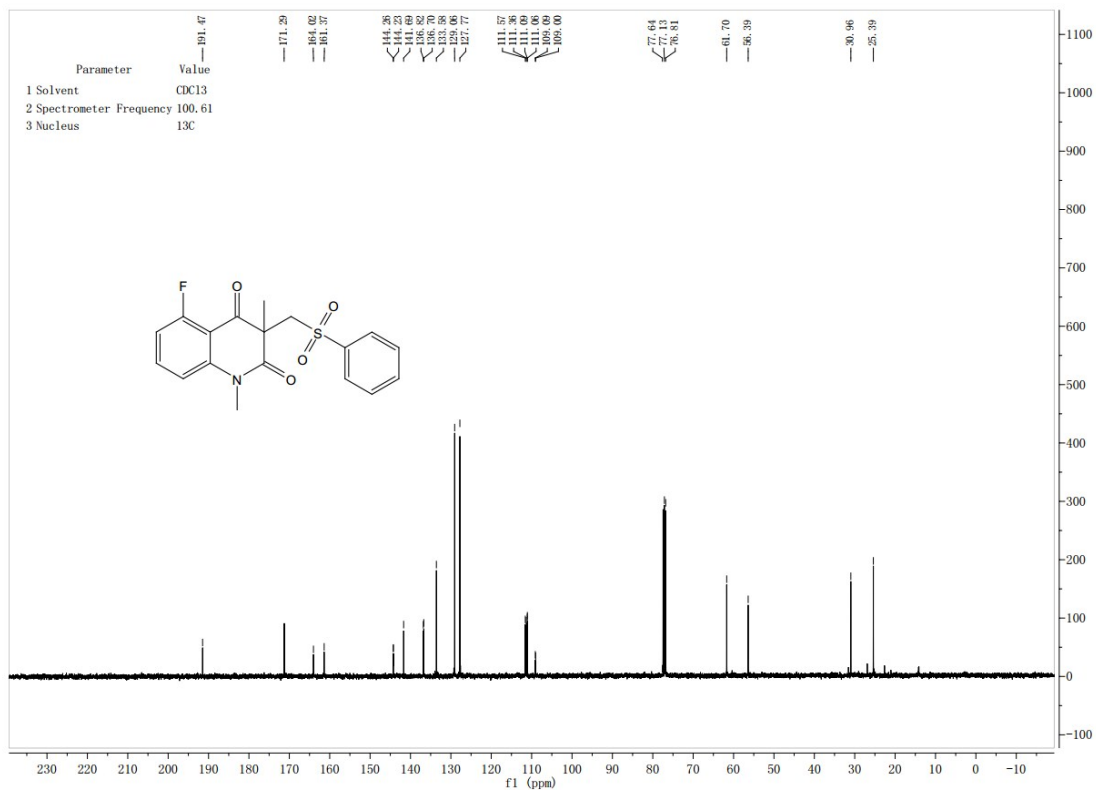

3s

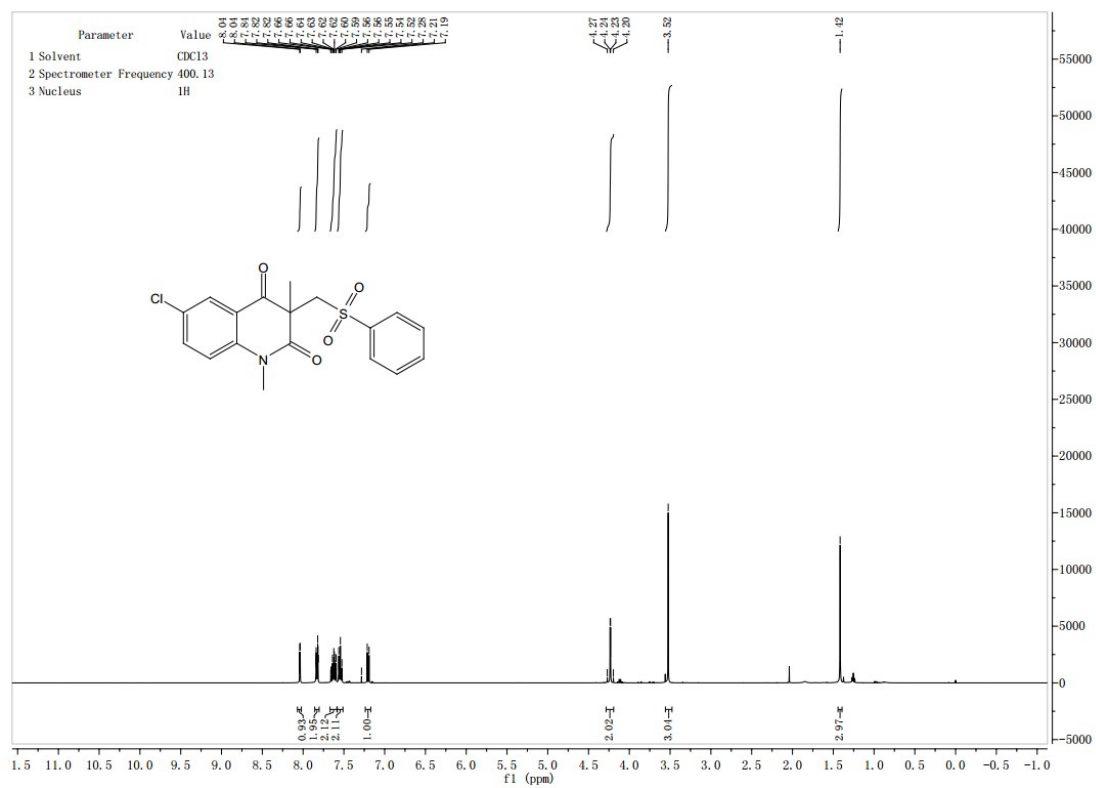





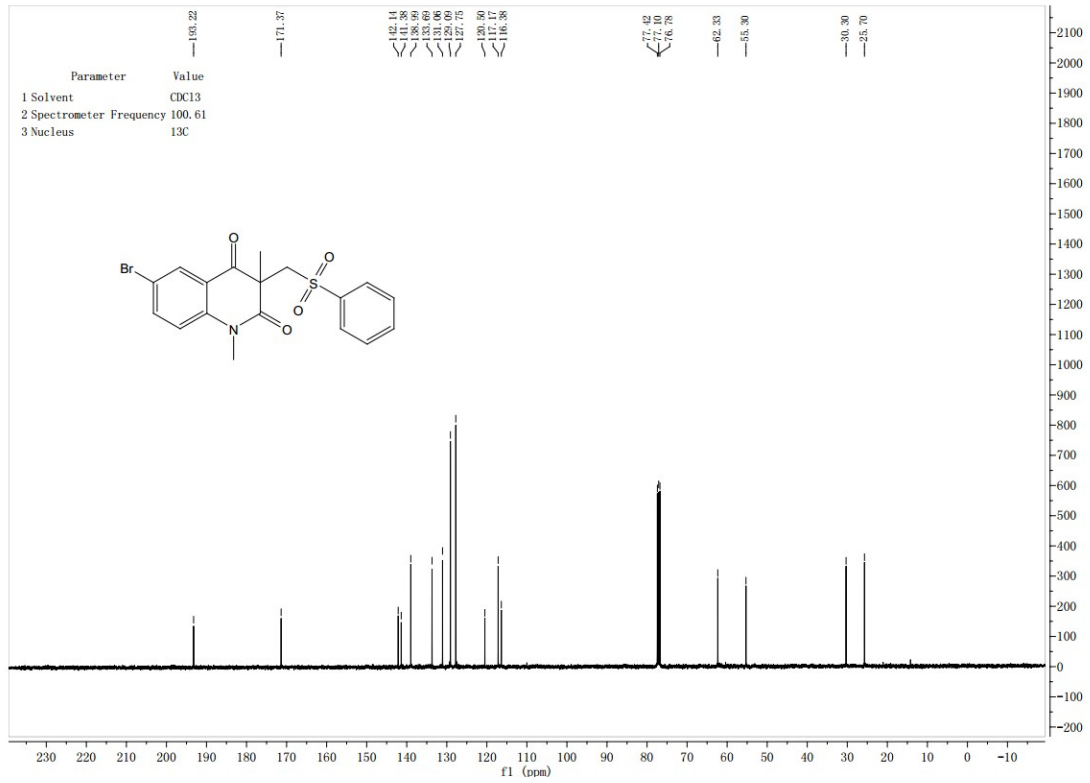

3u

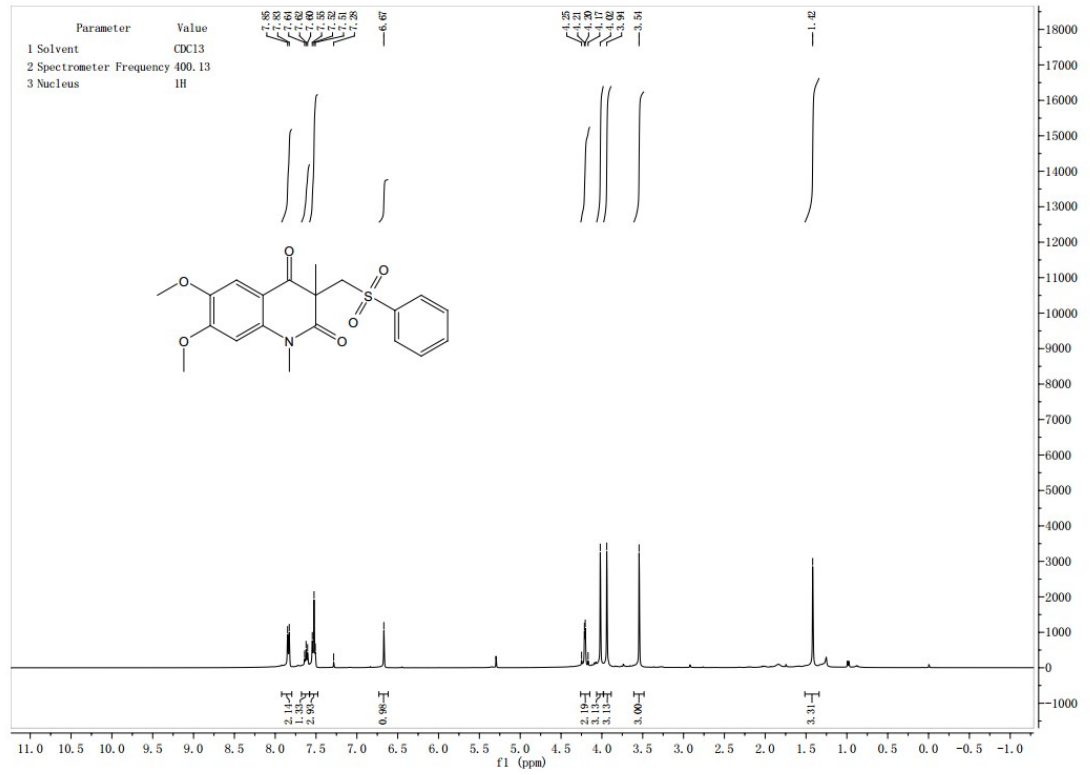

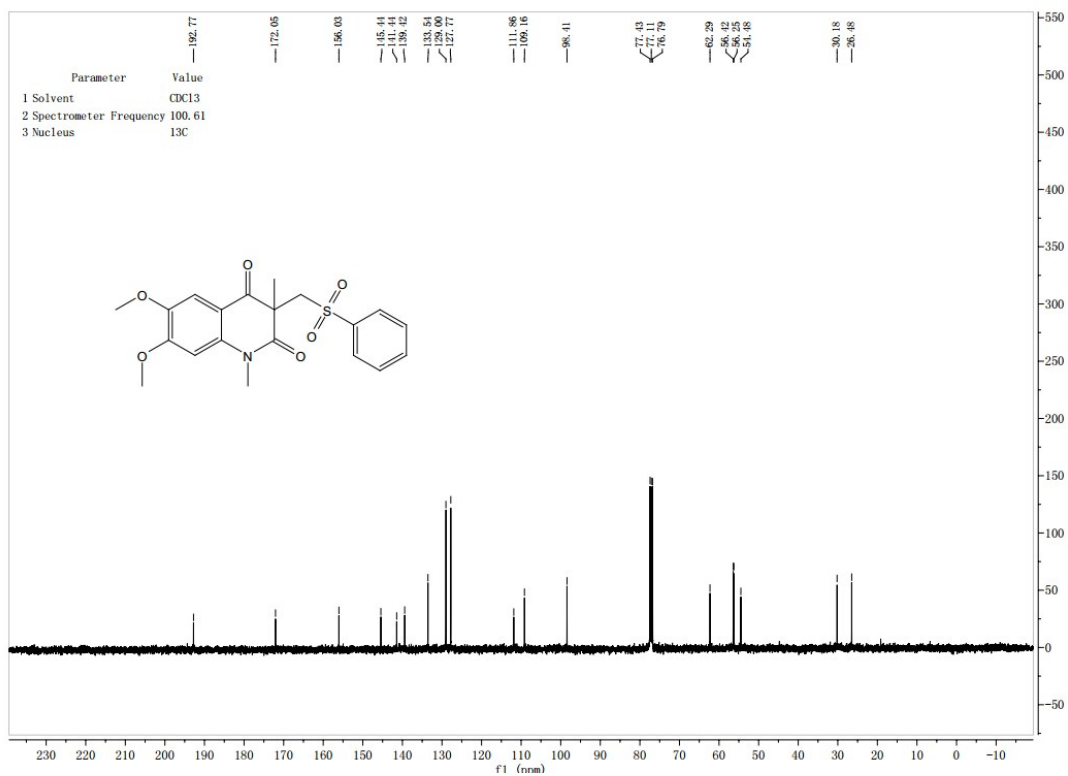

Supplement: c5ra27878c1.pdf [file c5ra27878c1.pdf]
